# Supplementary material for: β-Arrestin2-biased Drd2 agonist UNC9995 alleviates astrocyte inflammatory injury via interaction between β-arrestin2 and STAT3 in mouse model of depression
Source: PubMed Central journal article supplement (PMC9526944; doi:10.1186/s12974-022-02597-6), 2022-10-01

Fig.2C  
csds-cGAS/actin

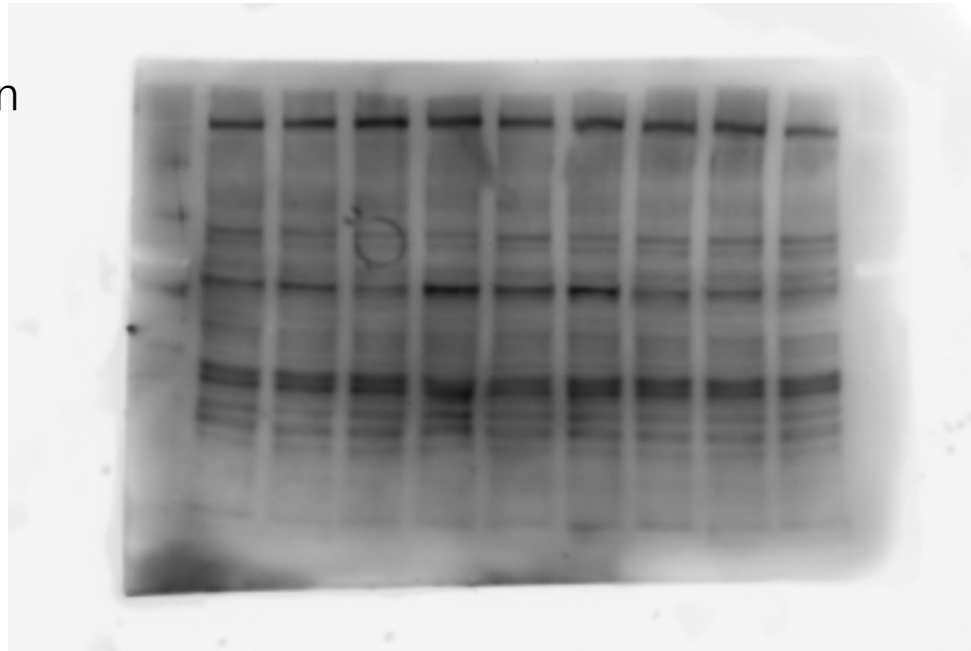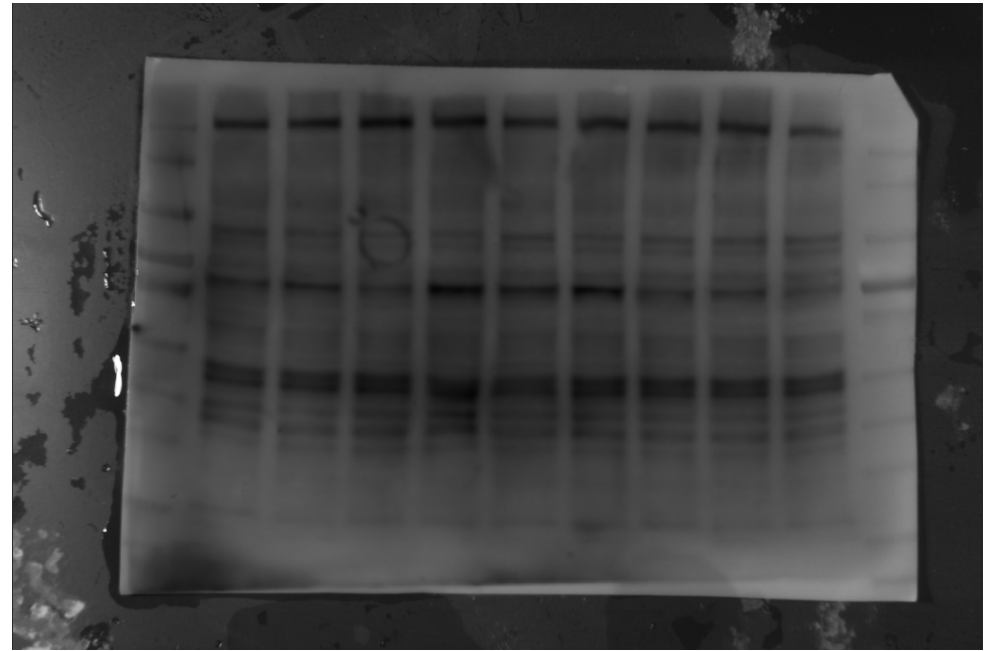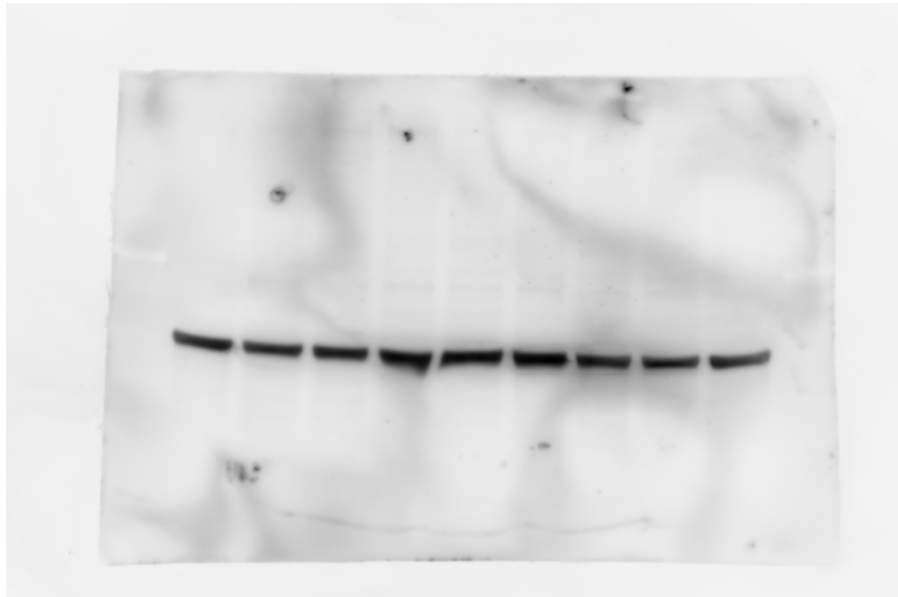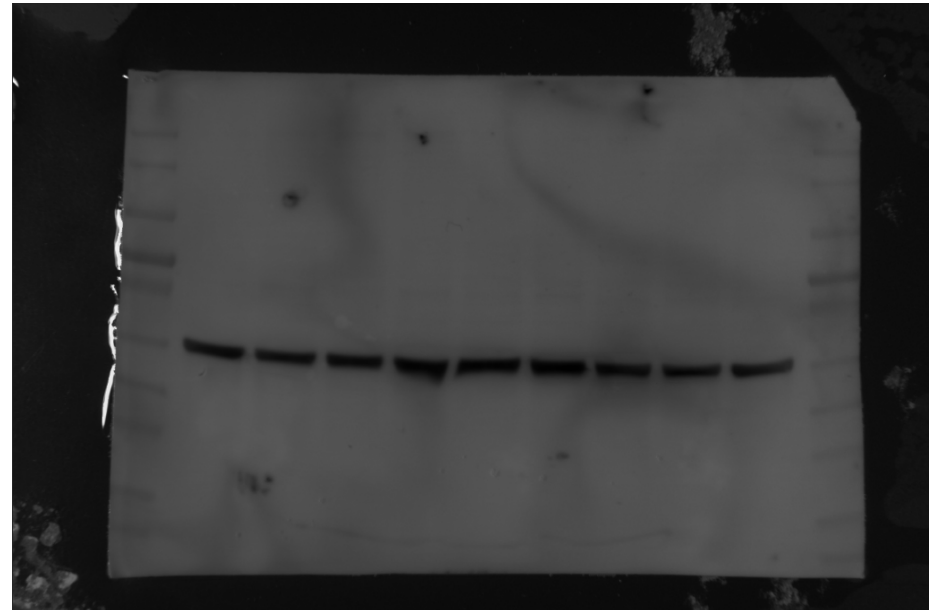

Fig.2C

CSDS-p-TBK1

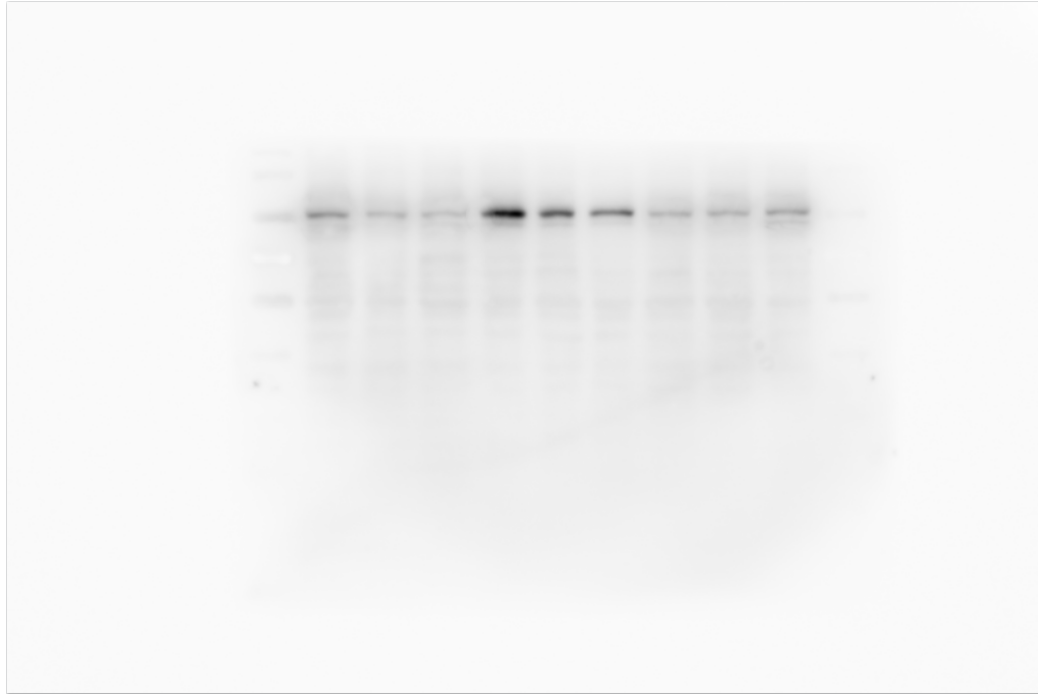

Fig.2C

csds-TBK1

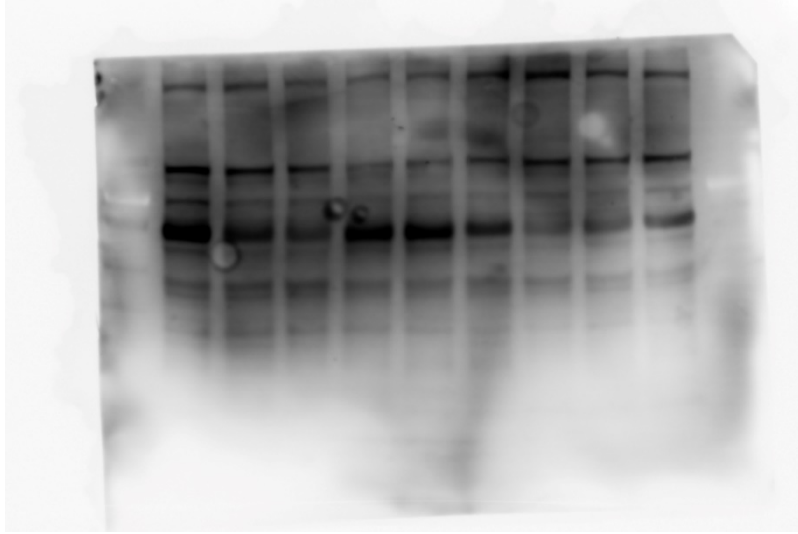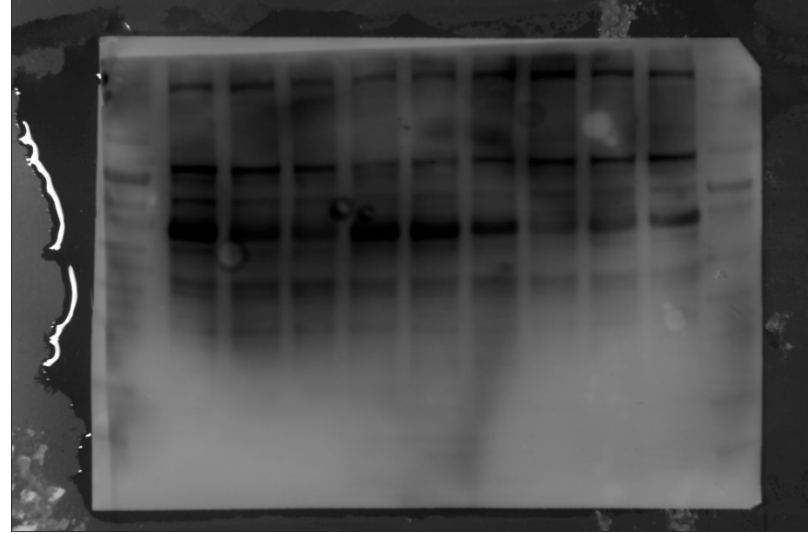

Fig.2C

csds-p-sting/actin

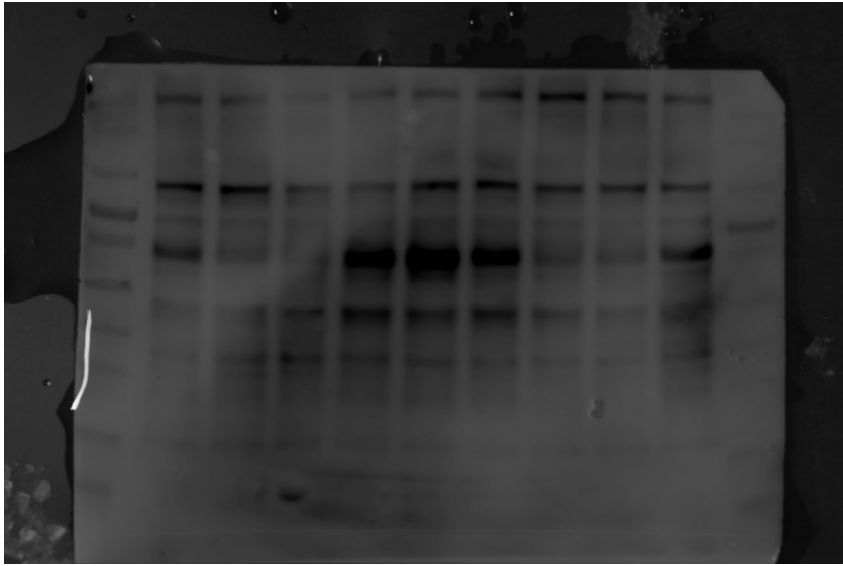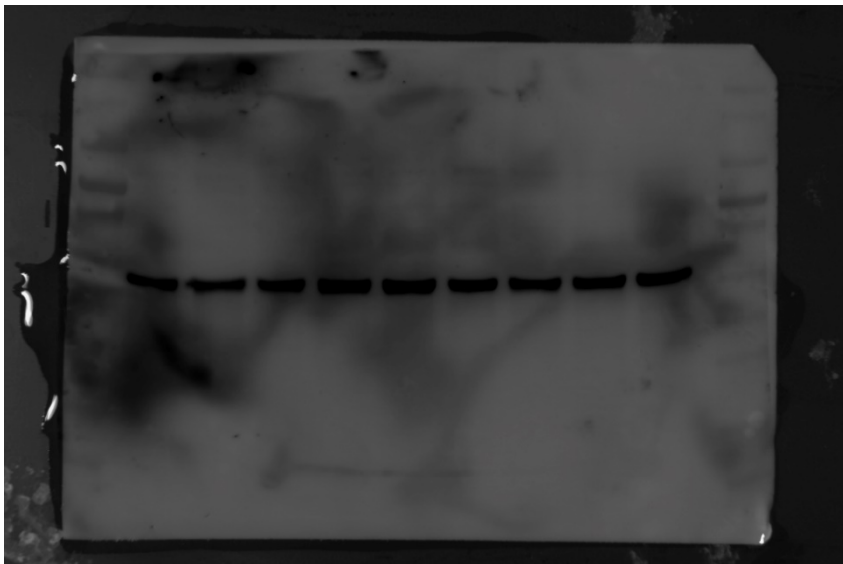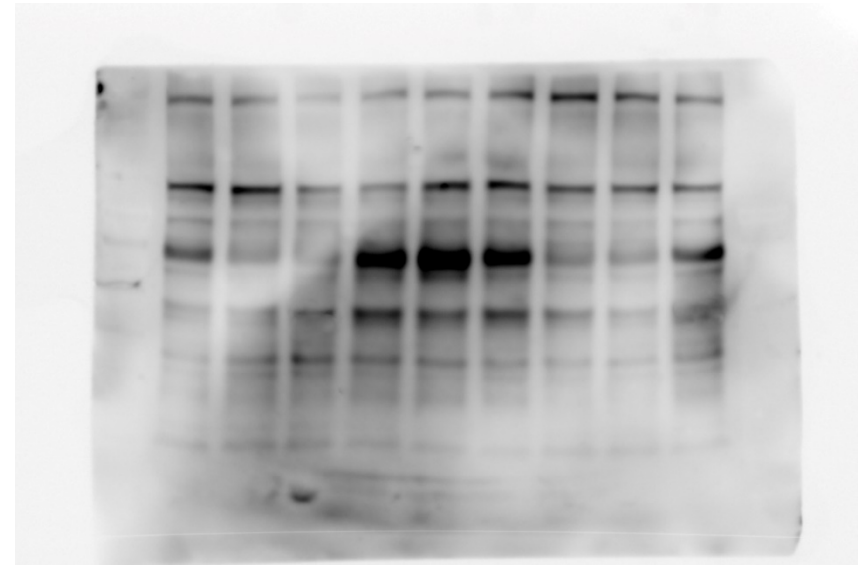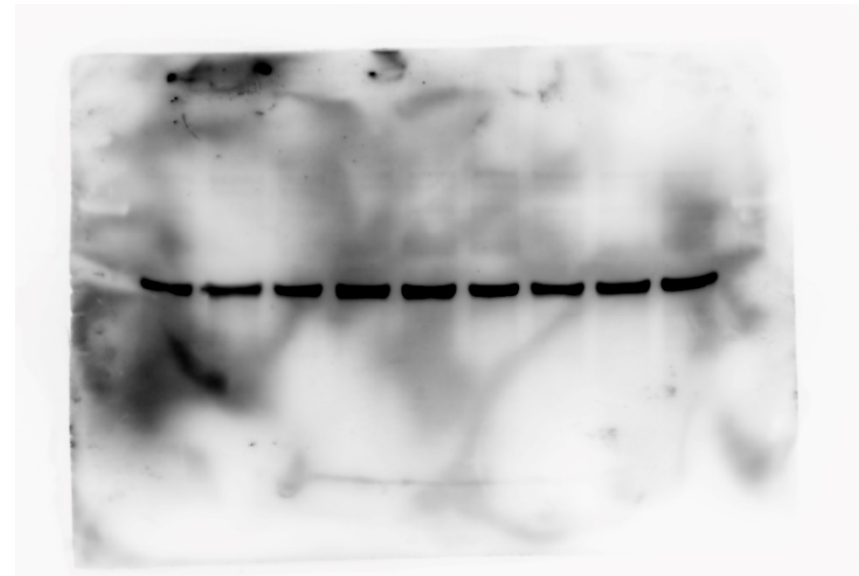

Fig.2C  
csds-STING

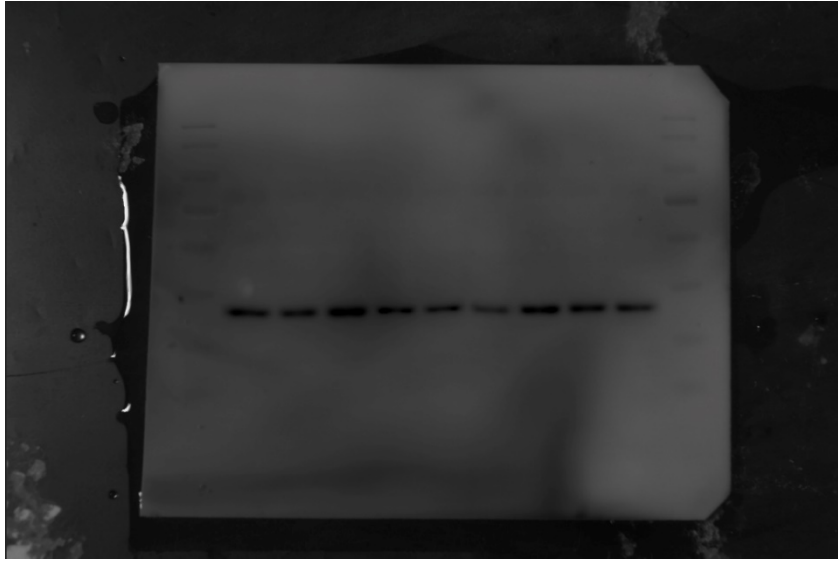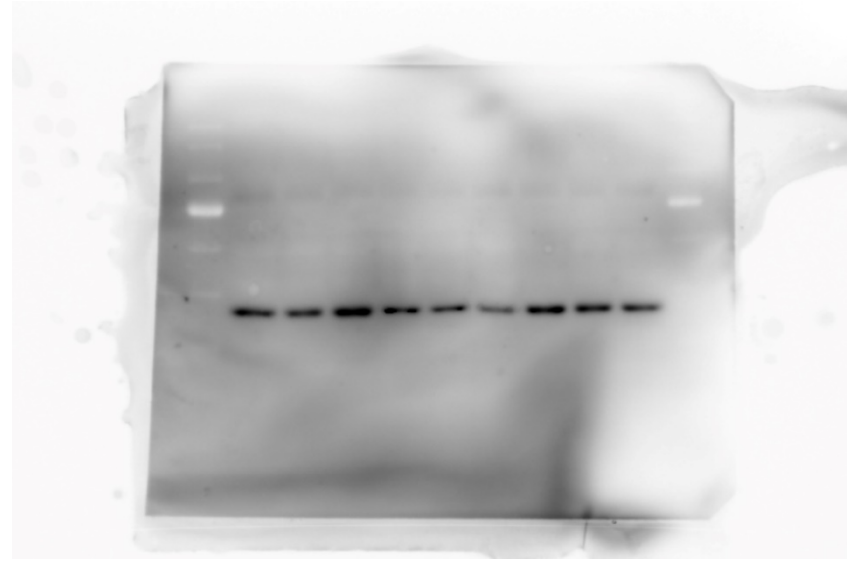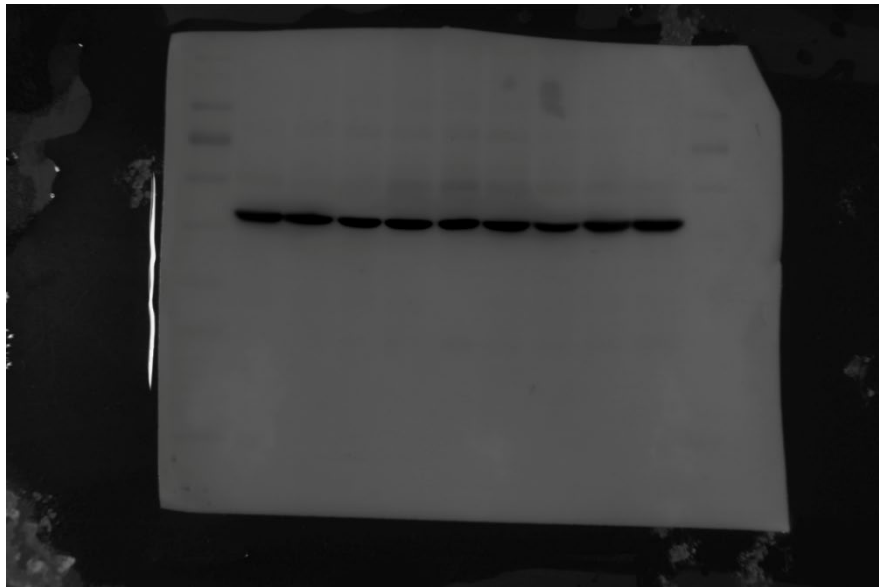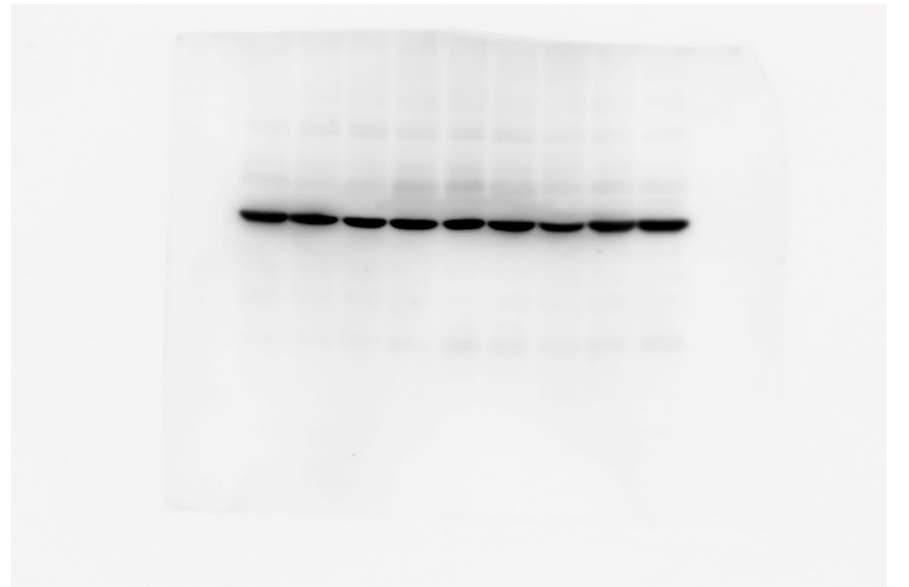

Fig.2C

*csds-irf3/*  
*gapdh*

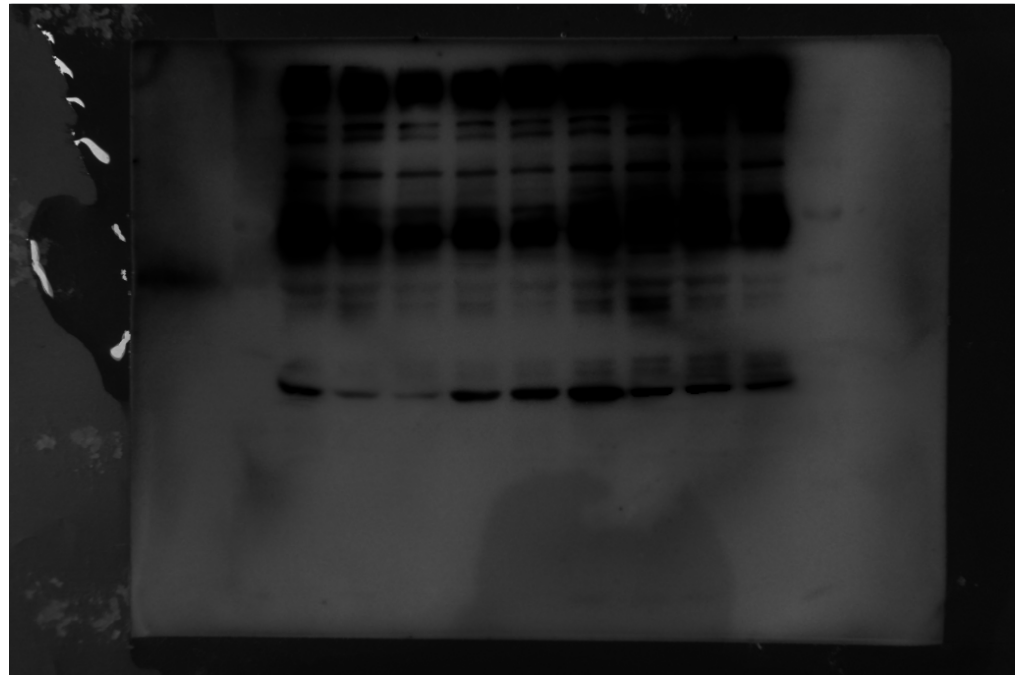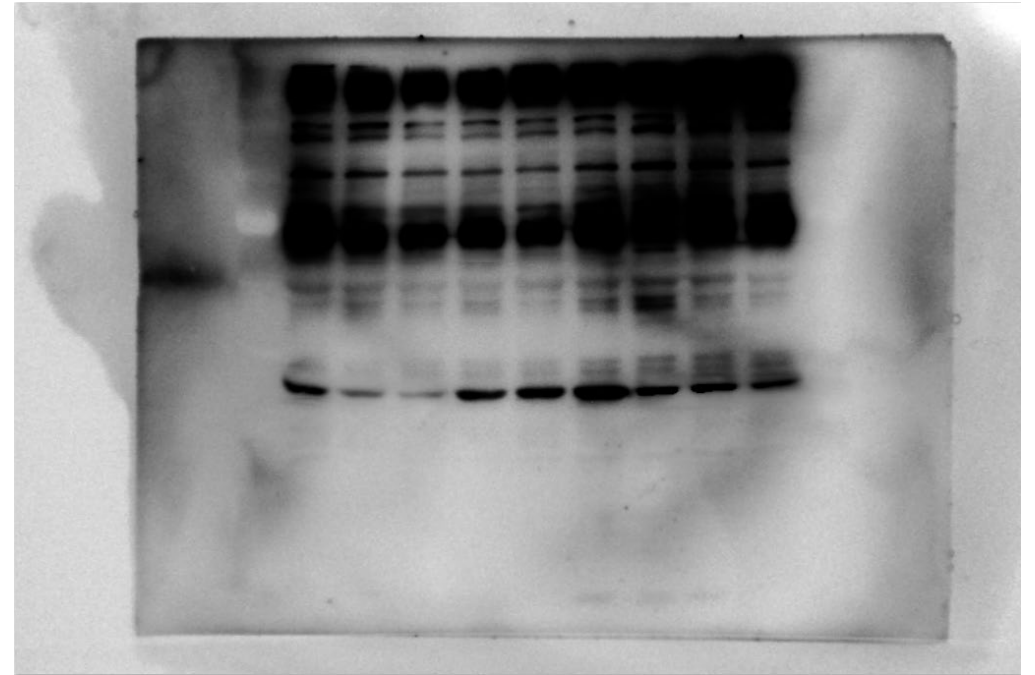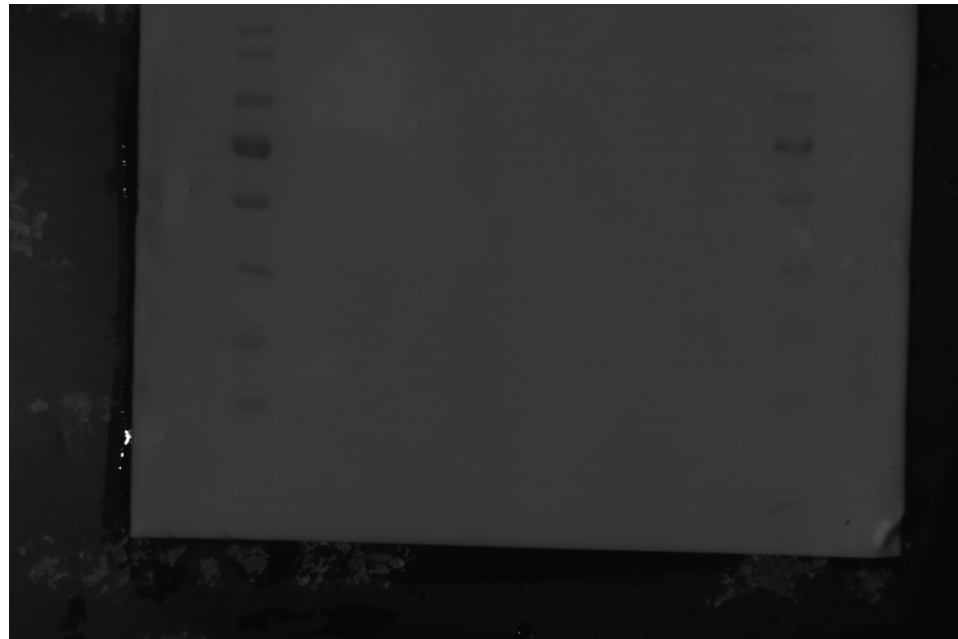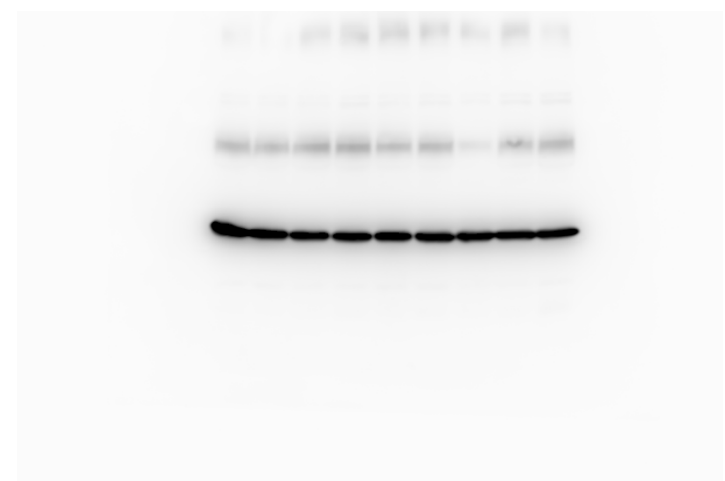

Fig.3B

Csds-DRD1

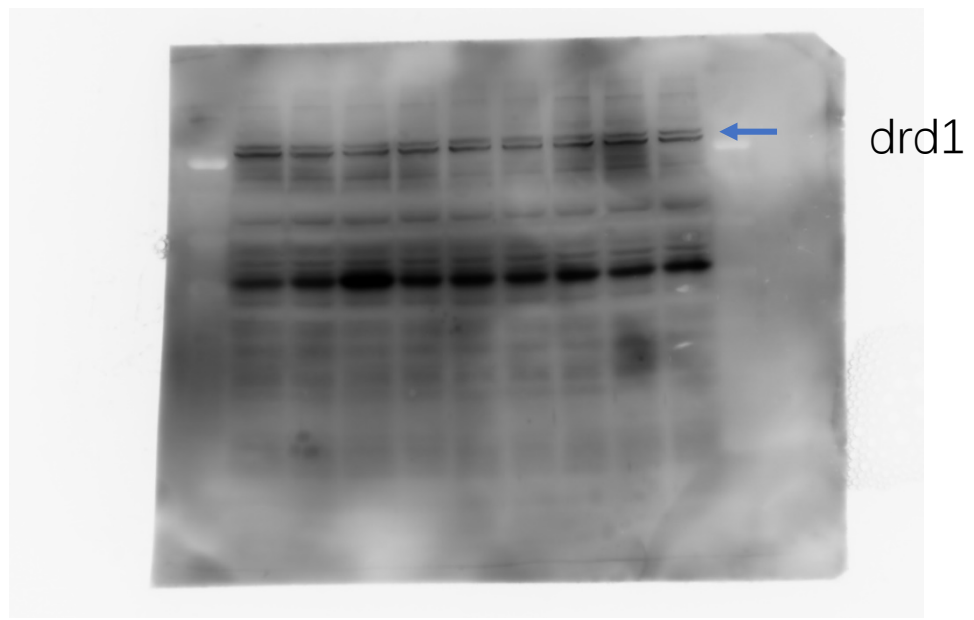

actin

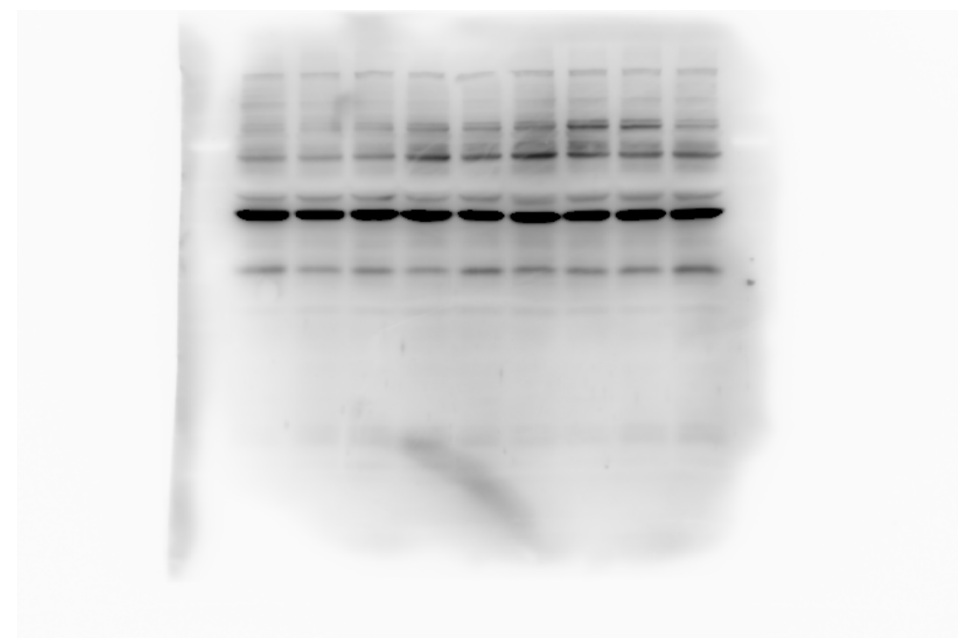

Fig.3B

Csds-DRD2

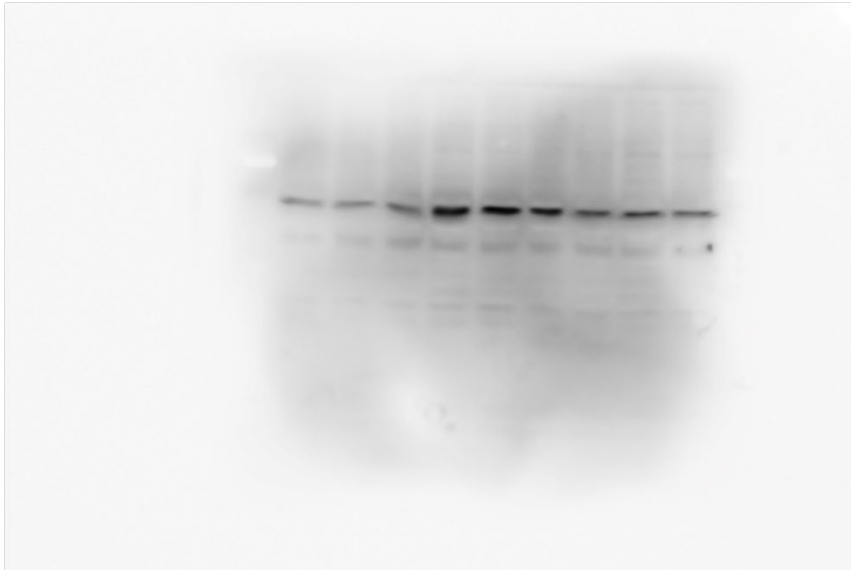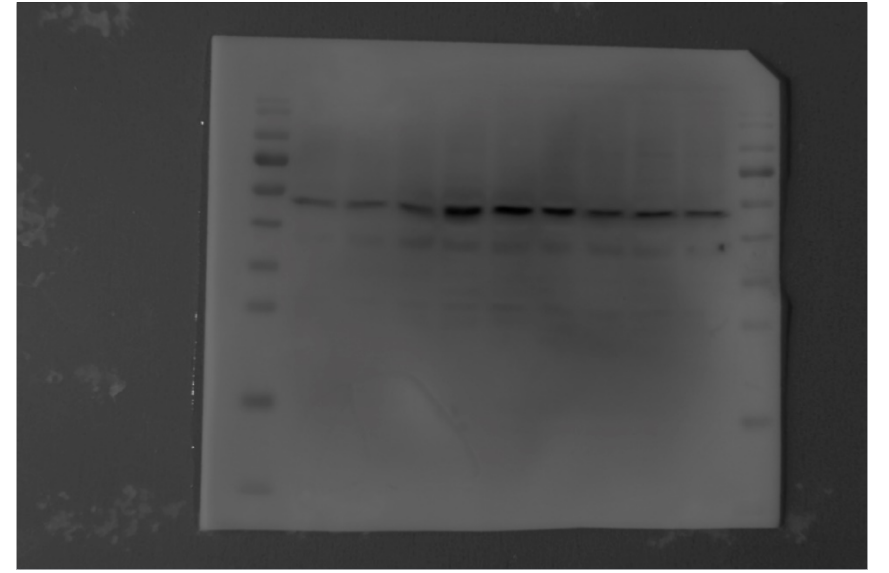

actin

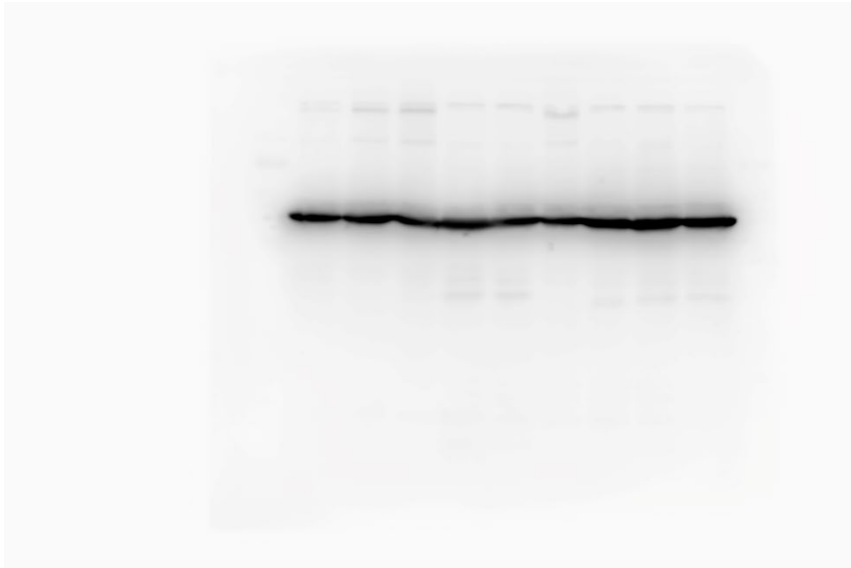



Fig.3B

CSDS-ARRB1

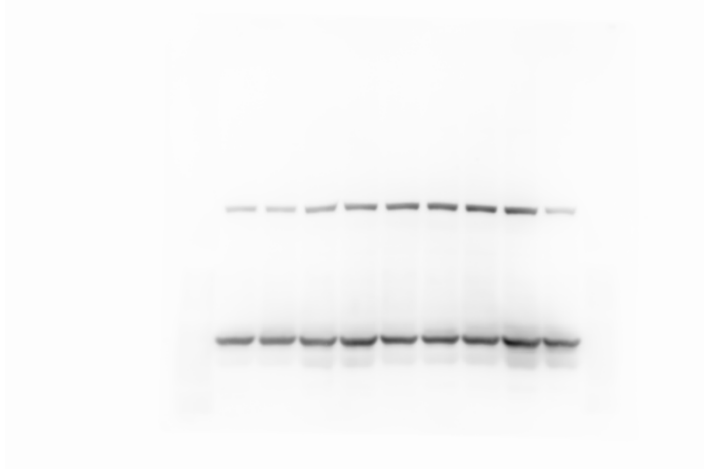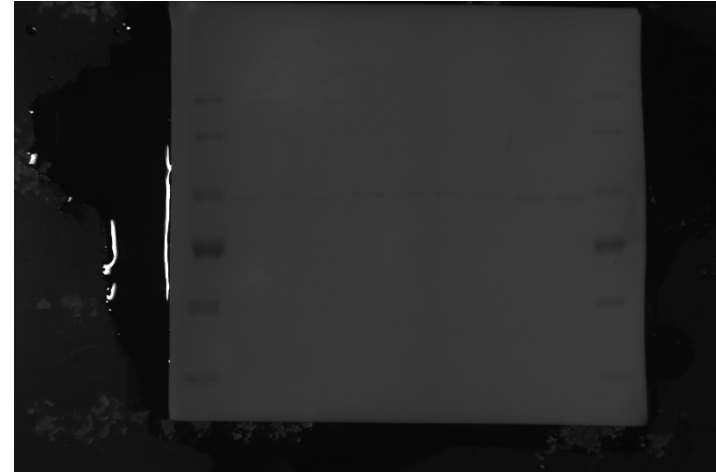

Actin

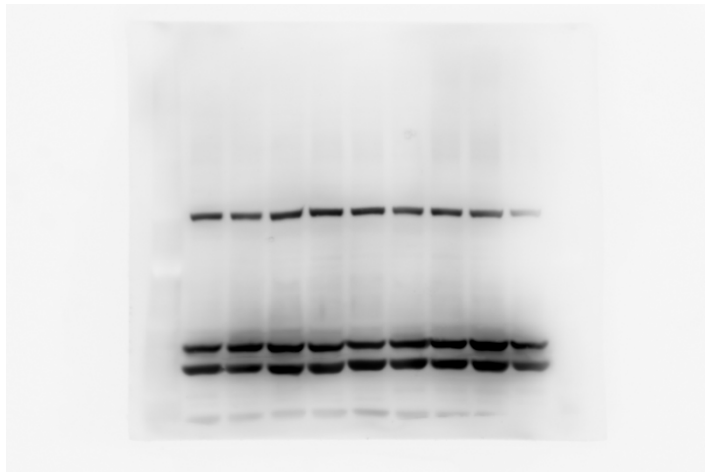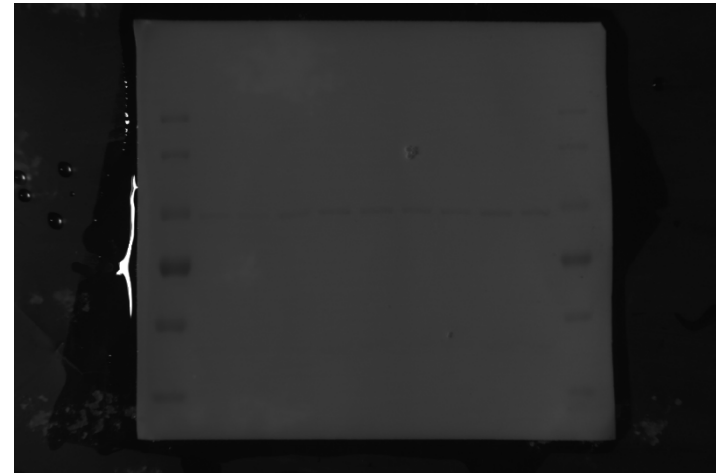

Fig.3B

CSDS-ARRB2

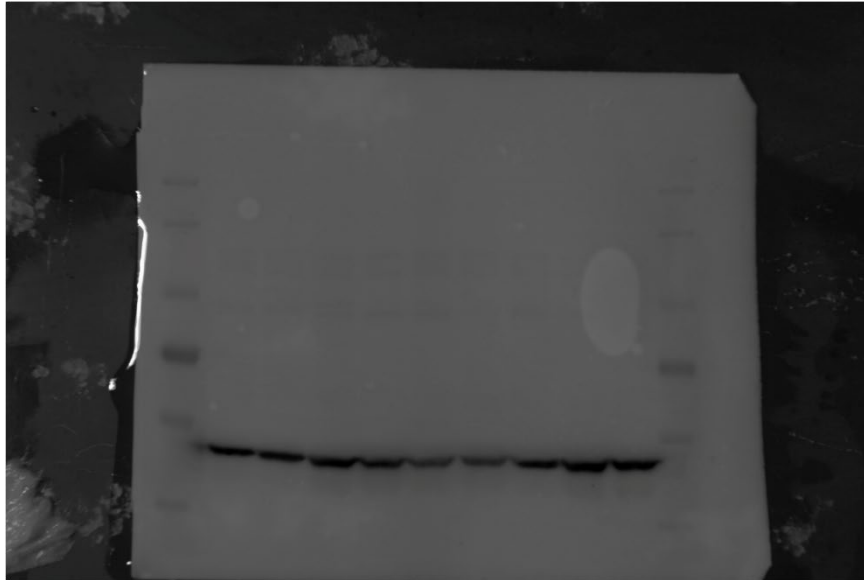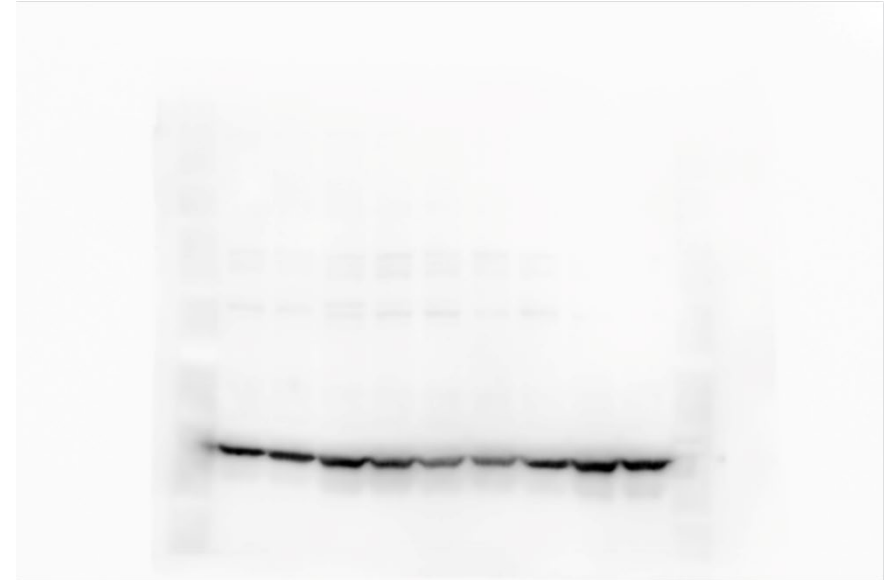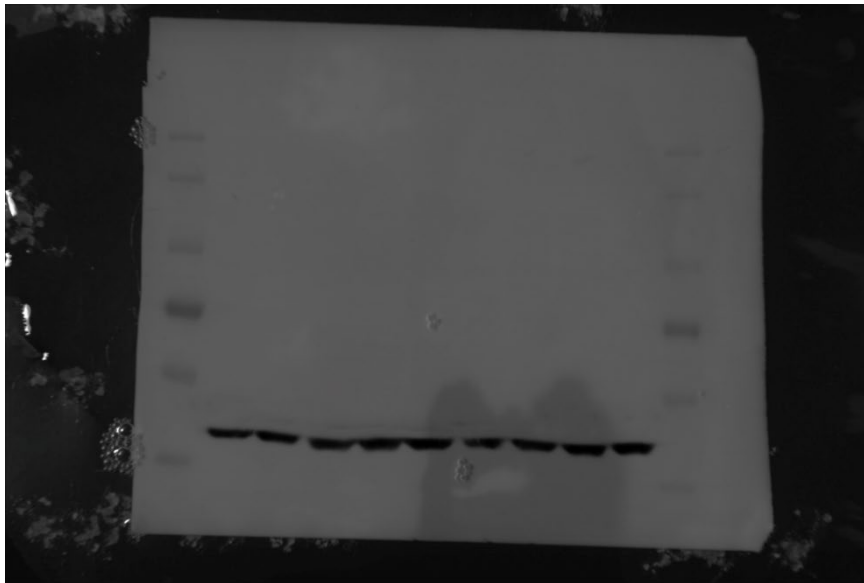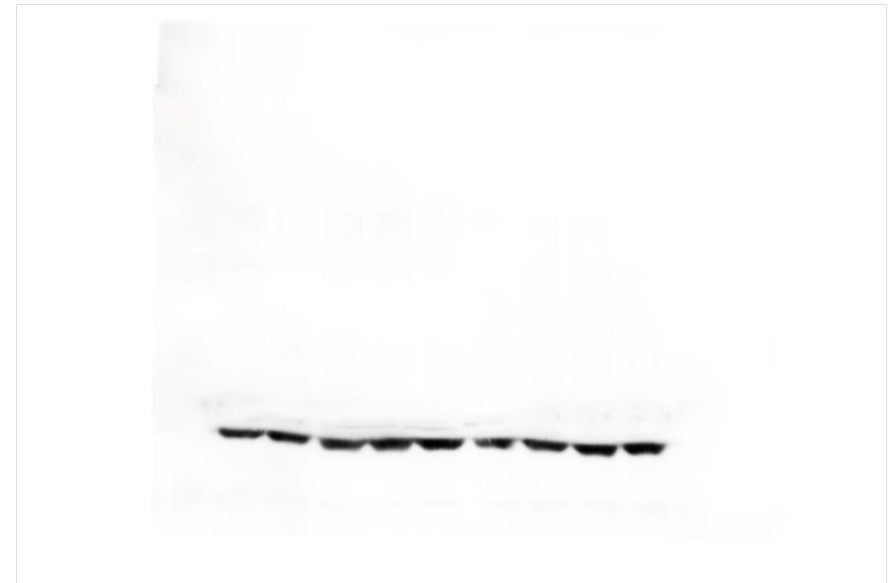

Fig.3B

CSDS-gfap

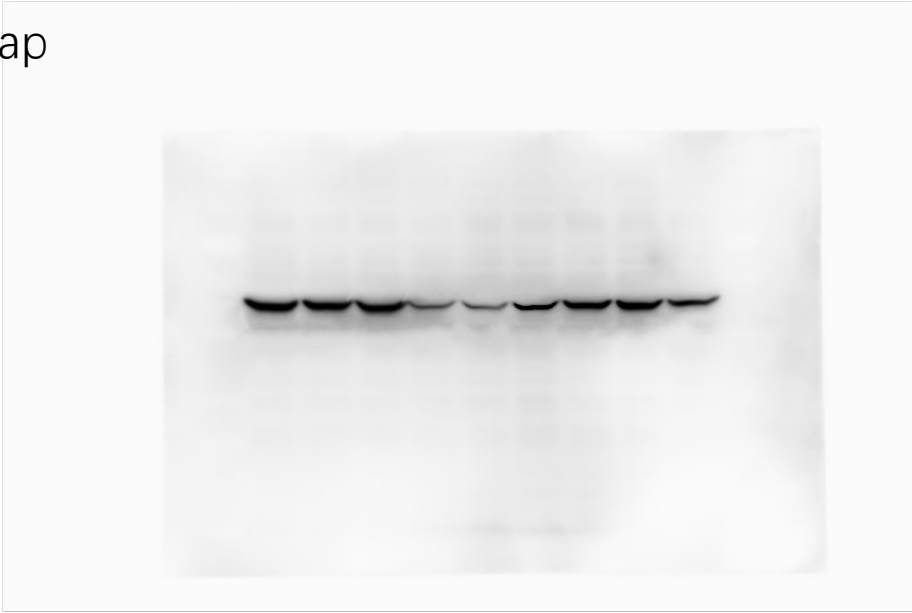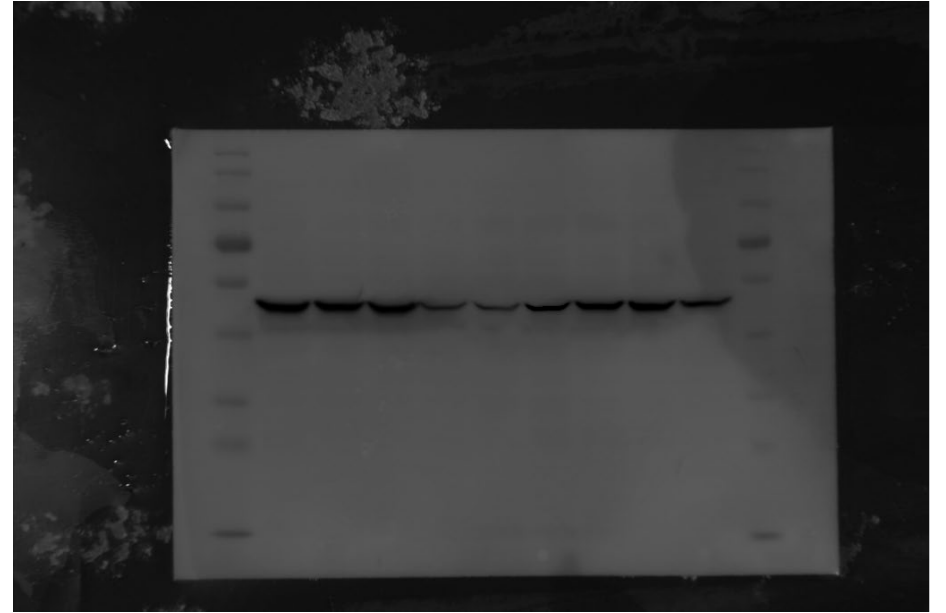

Actin (下面一条)

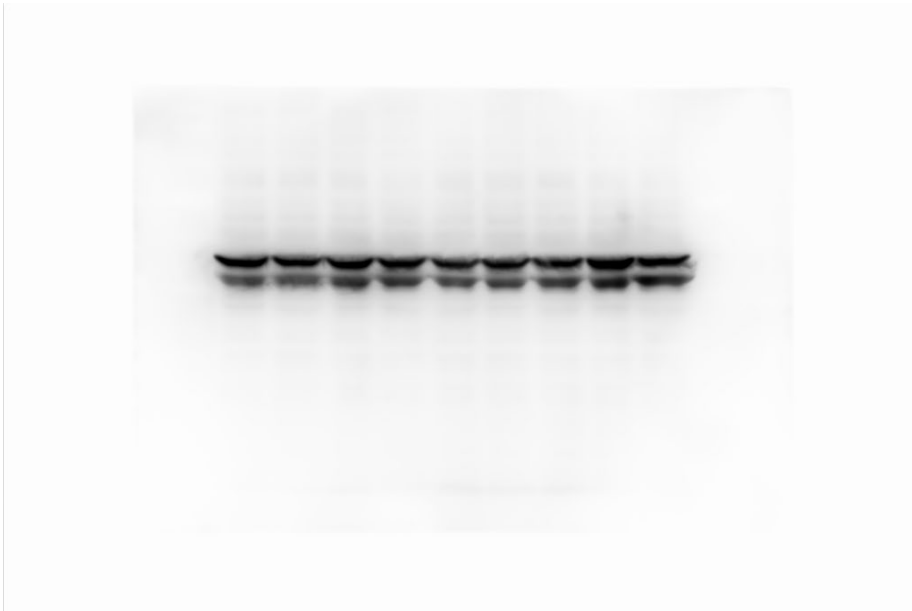

Fig.4F

WT&Arrb2<sup>-/-</sup>-As  
IL-6 stimulation

BAX

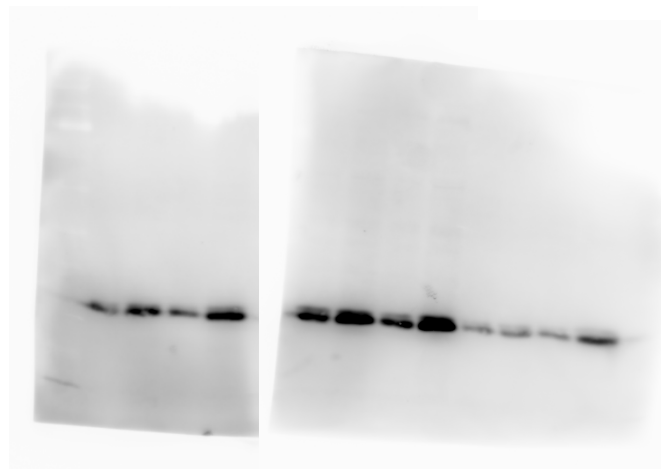

Actin

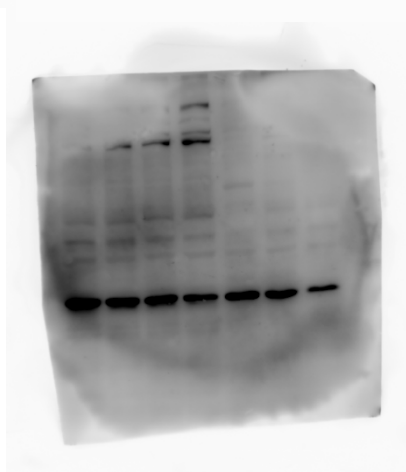

WT&Arrb2<sup>-/-</sup>-As  
IL-6 stimulation

Bcl-2

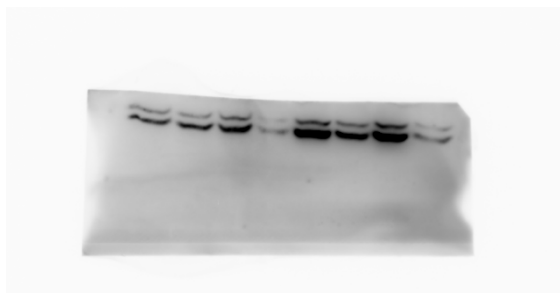

Actin

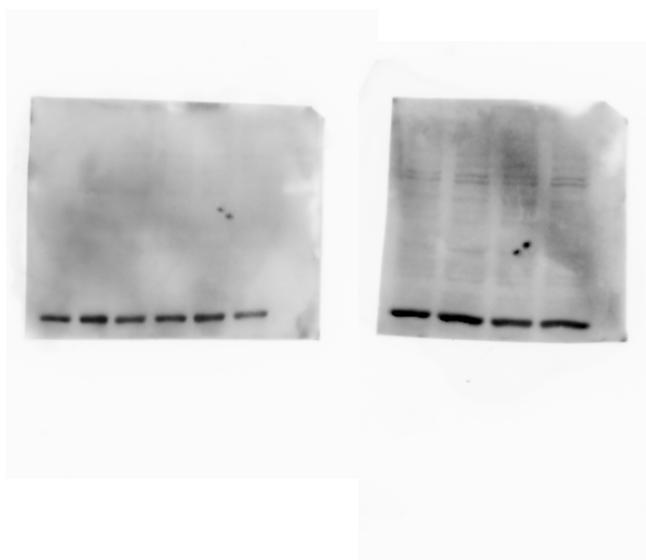

Fig.4I

WT&Arrb2<sup>-/-</sup>-As  
IL-6 stimulation-Nucleus

P-STAT3

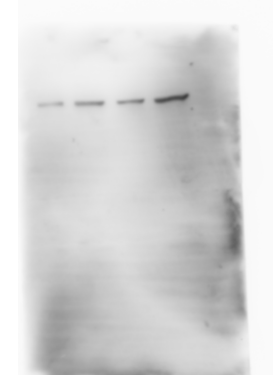

STAT3

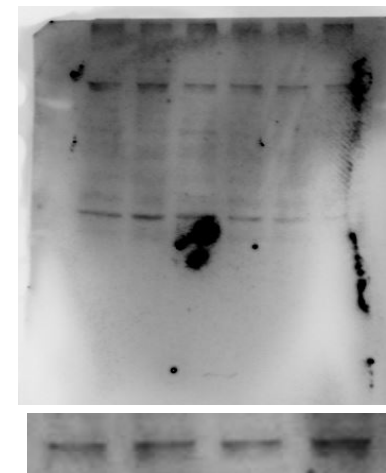

laminB1

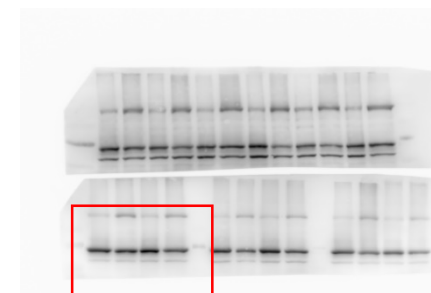

Fig.4G

WT&Arrb2<sup>-/-</sup>-As  
IL-6 stimulation

P-JAK

Actin

JAK

Actin

P-STAT3

STAT3

Actin

WT&Arrb2<sup>-/-</sup>-As  
IL-6 stimulation

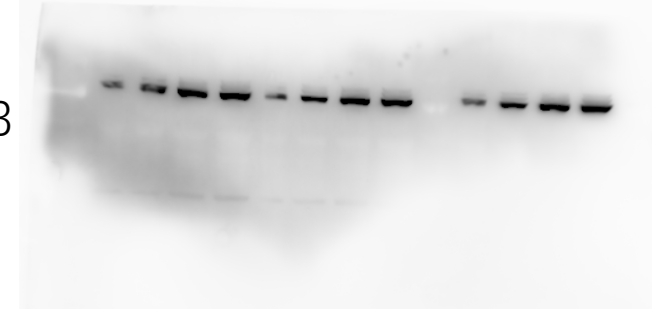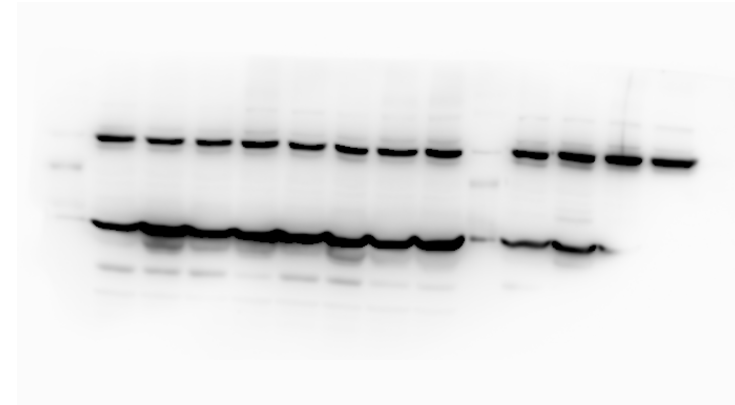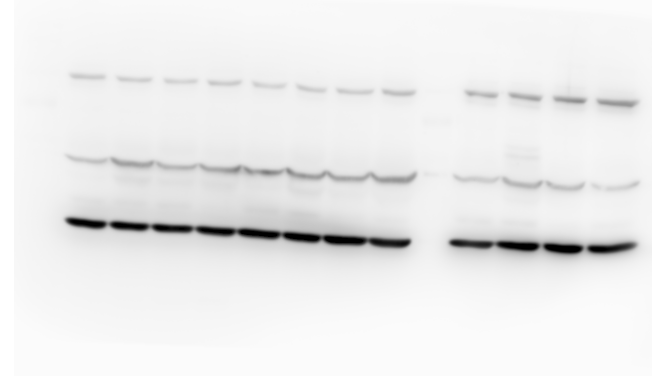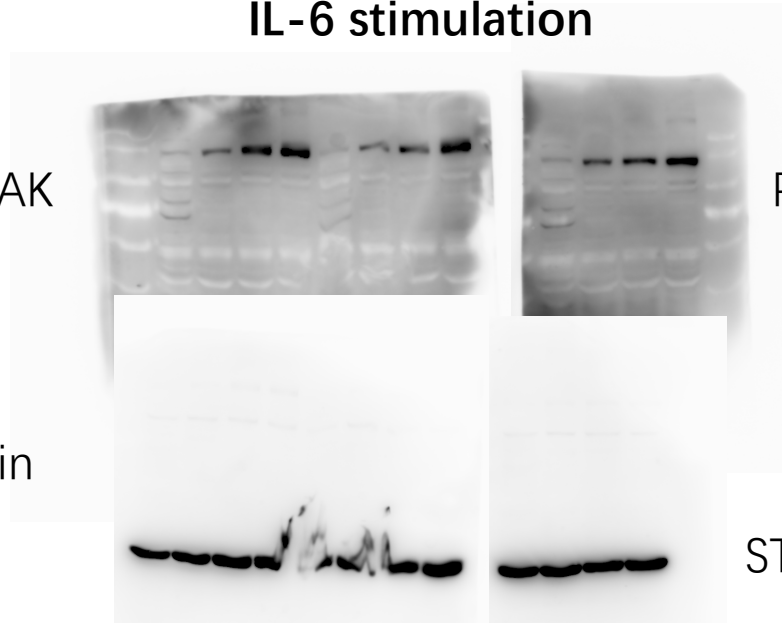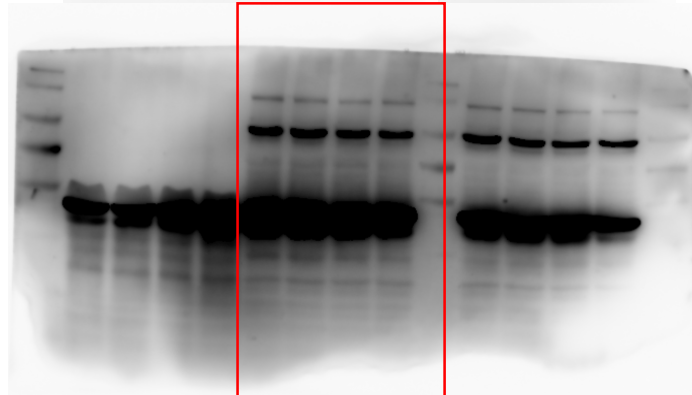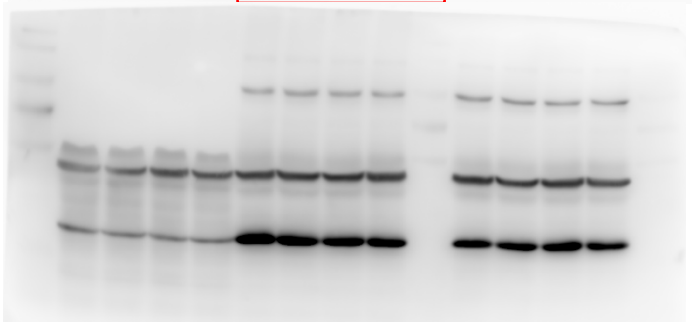

Fig.4H

Arrb2 siRNA-As  
IL-6 stimulation

P-JAK

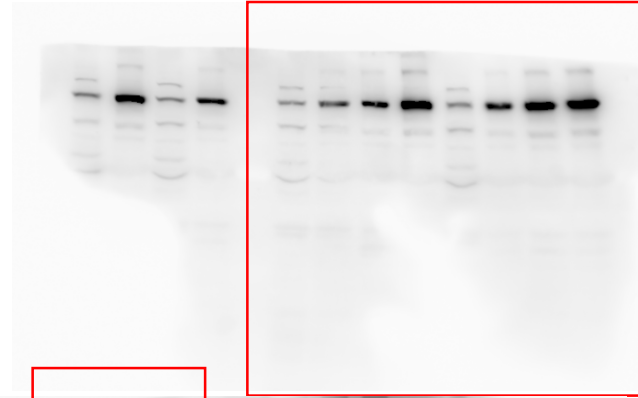

JAK

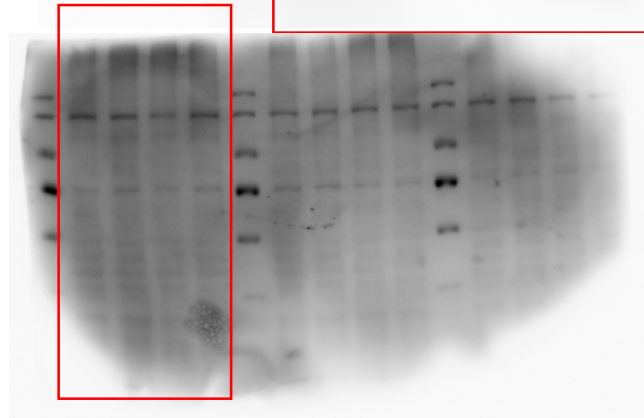

Actin

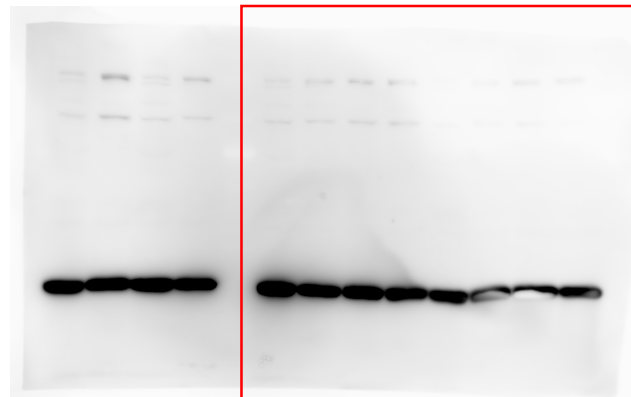

Arrb2 siRNA-As  
IL-6 stimulation

P-STAT3

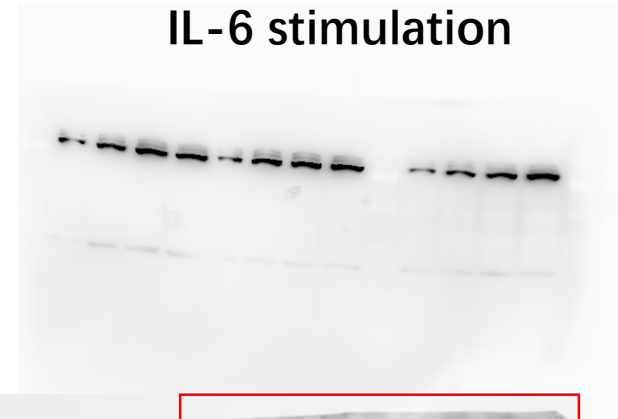

STAT3

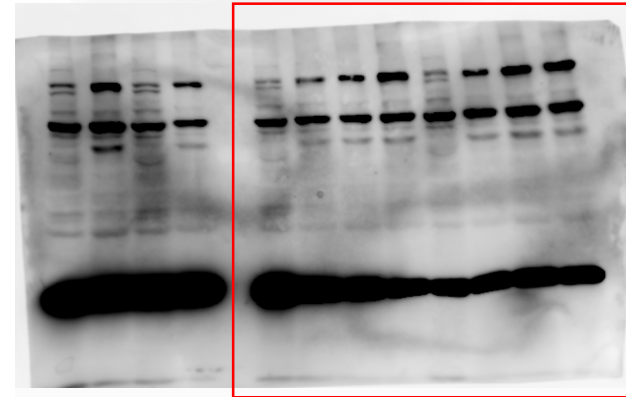

Actin

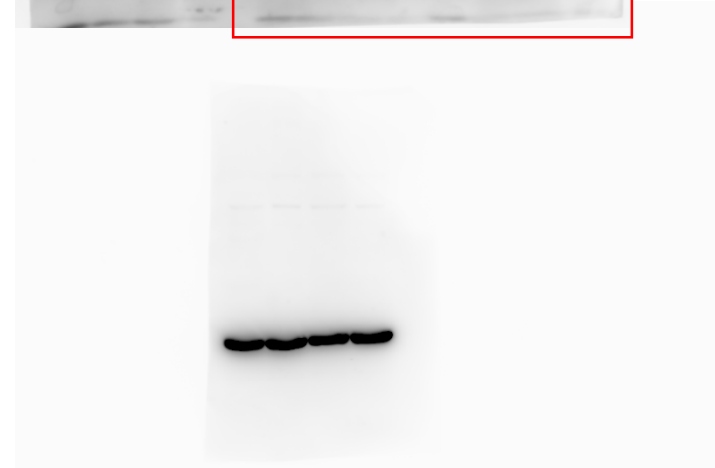

Fig.5F

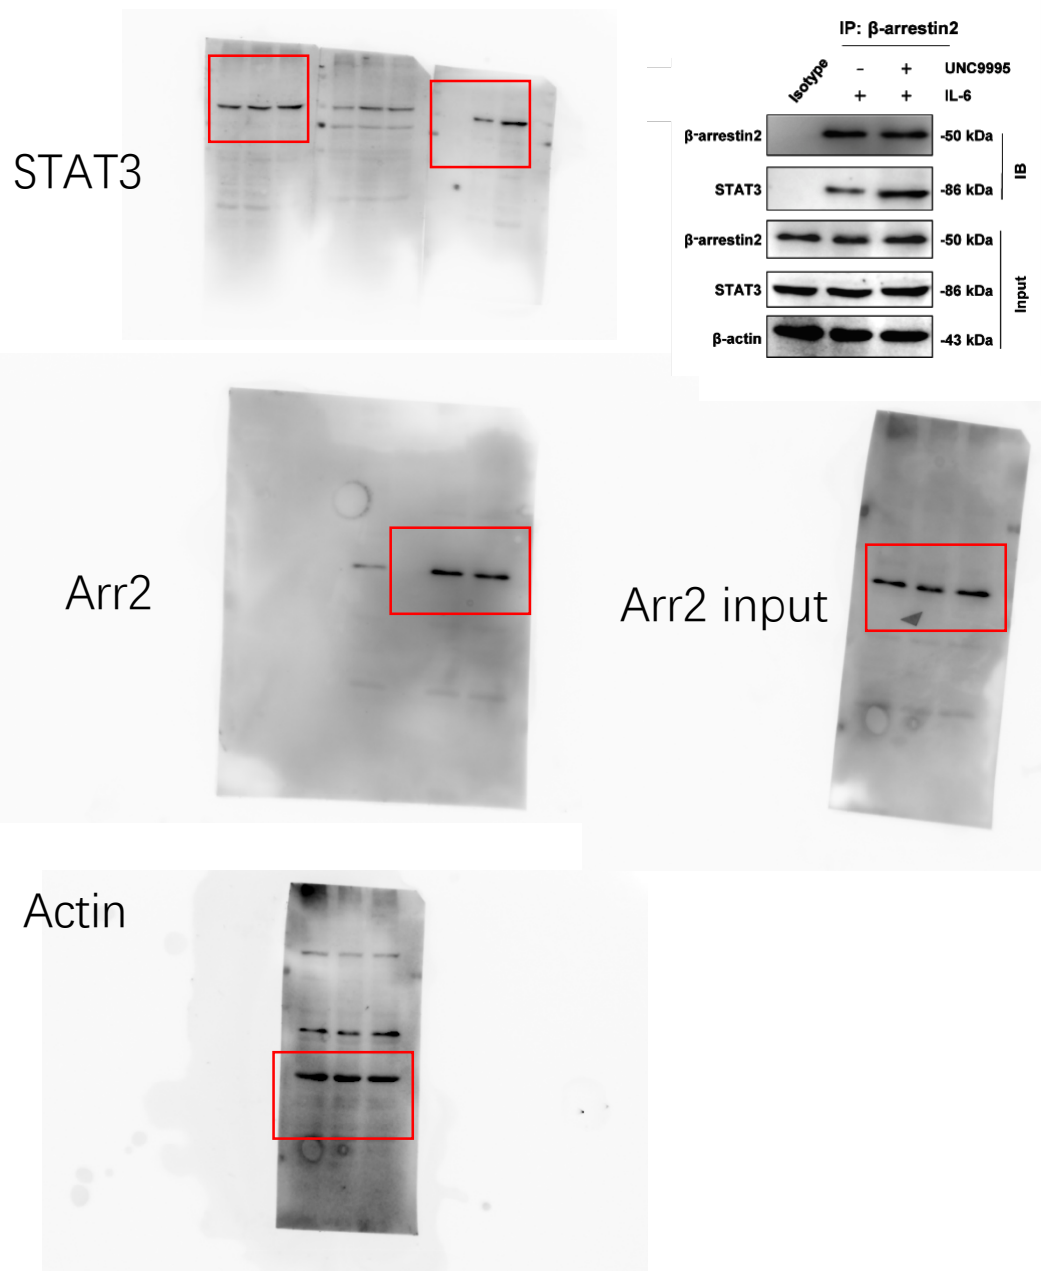

Fig.5D

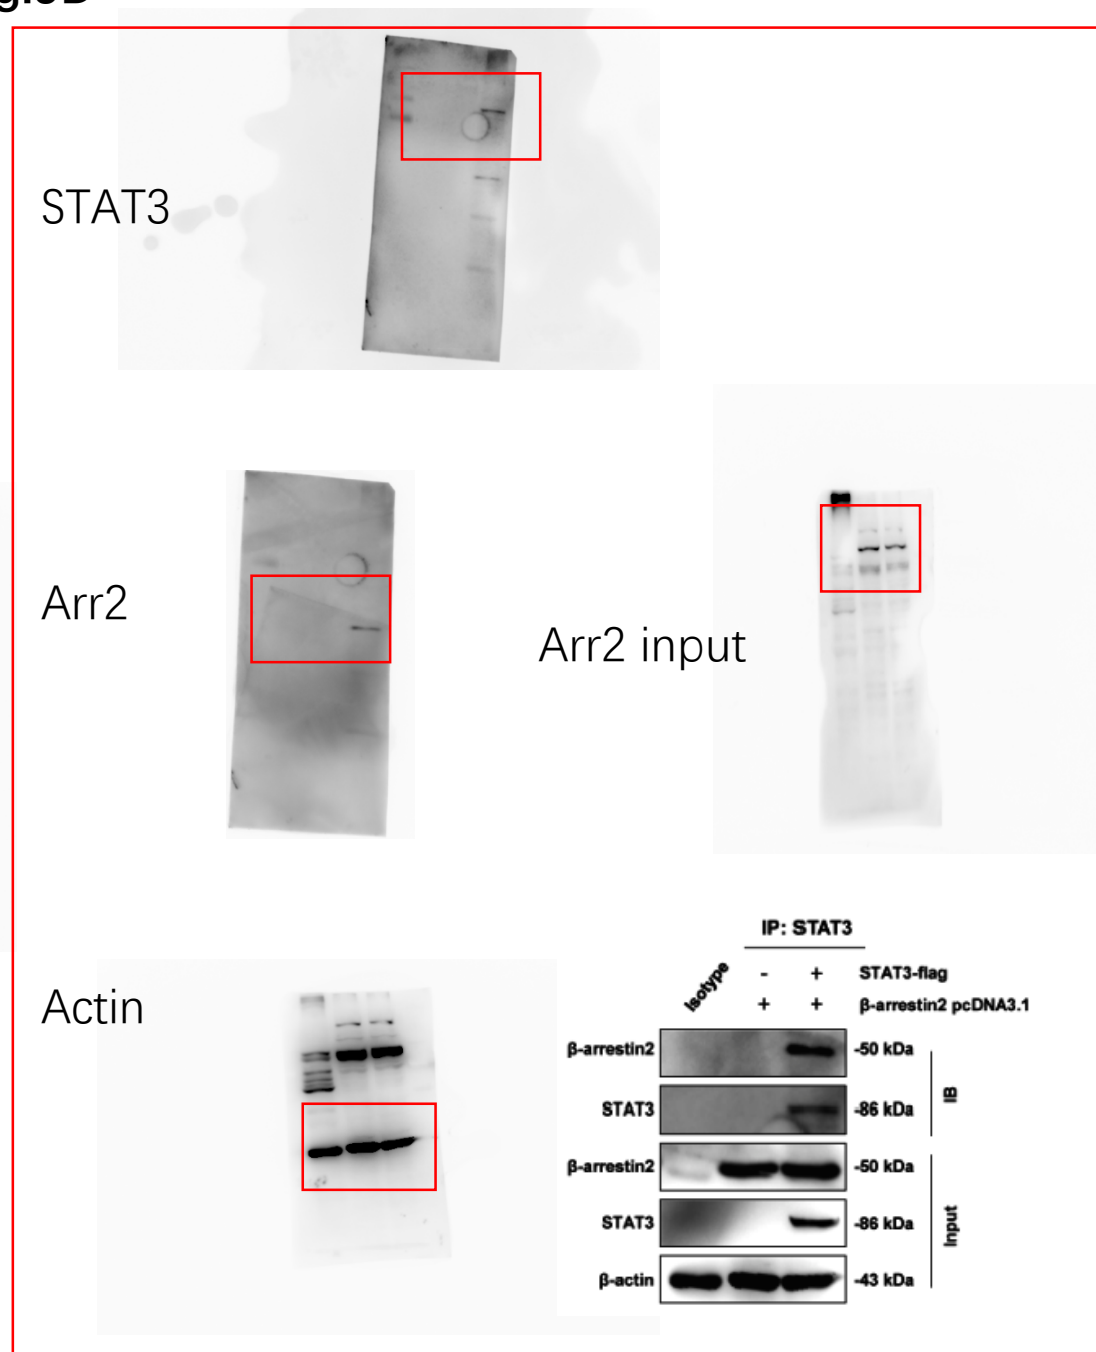

Fig.5E

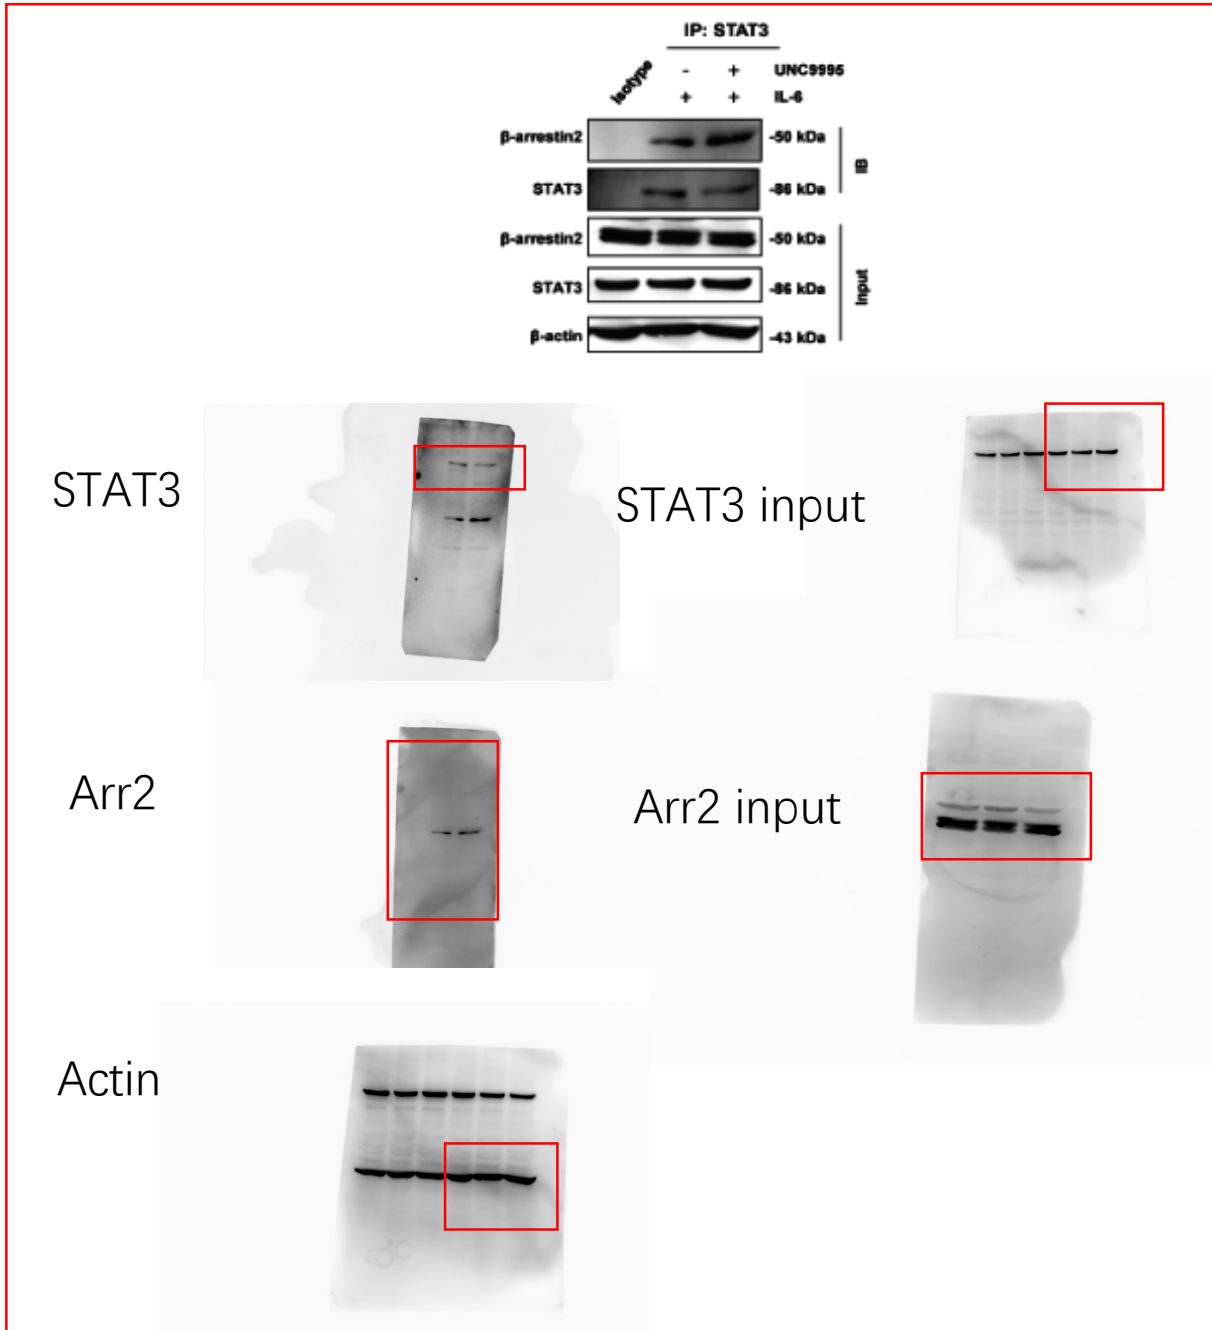

Fig.5G

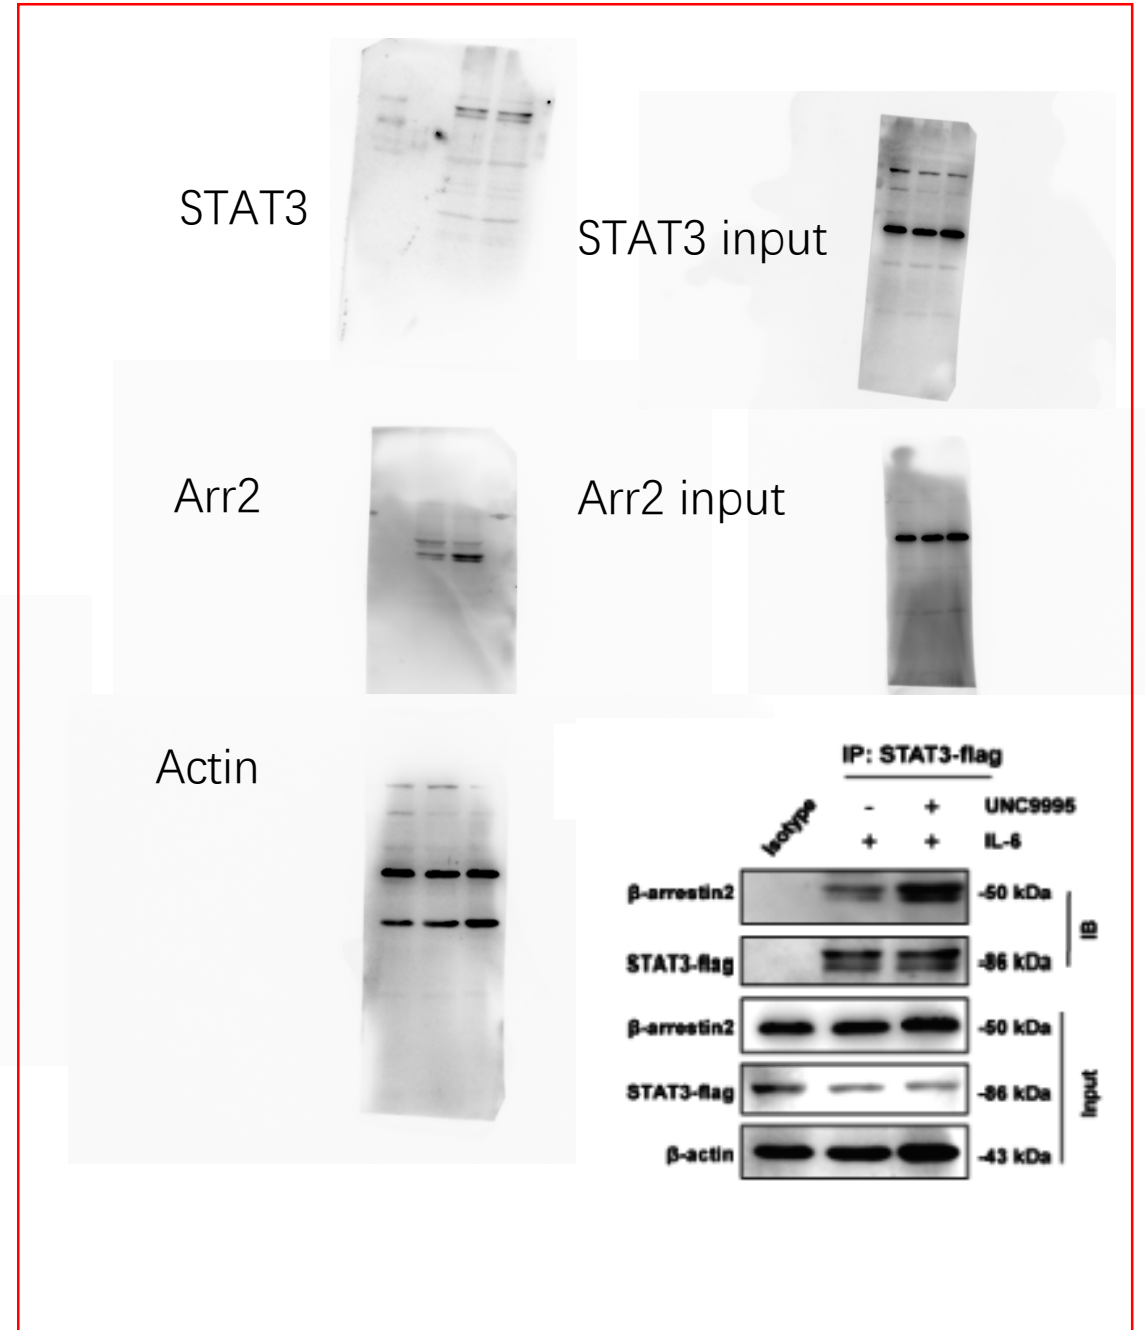



Fig.6E

WT-As unc9995  
IL-6 stimulation

WT-As unc9995  
IL-6 stimulation

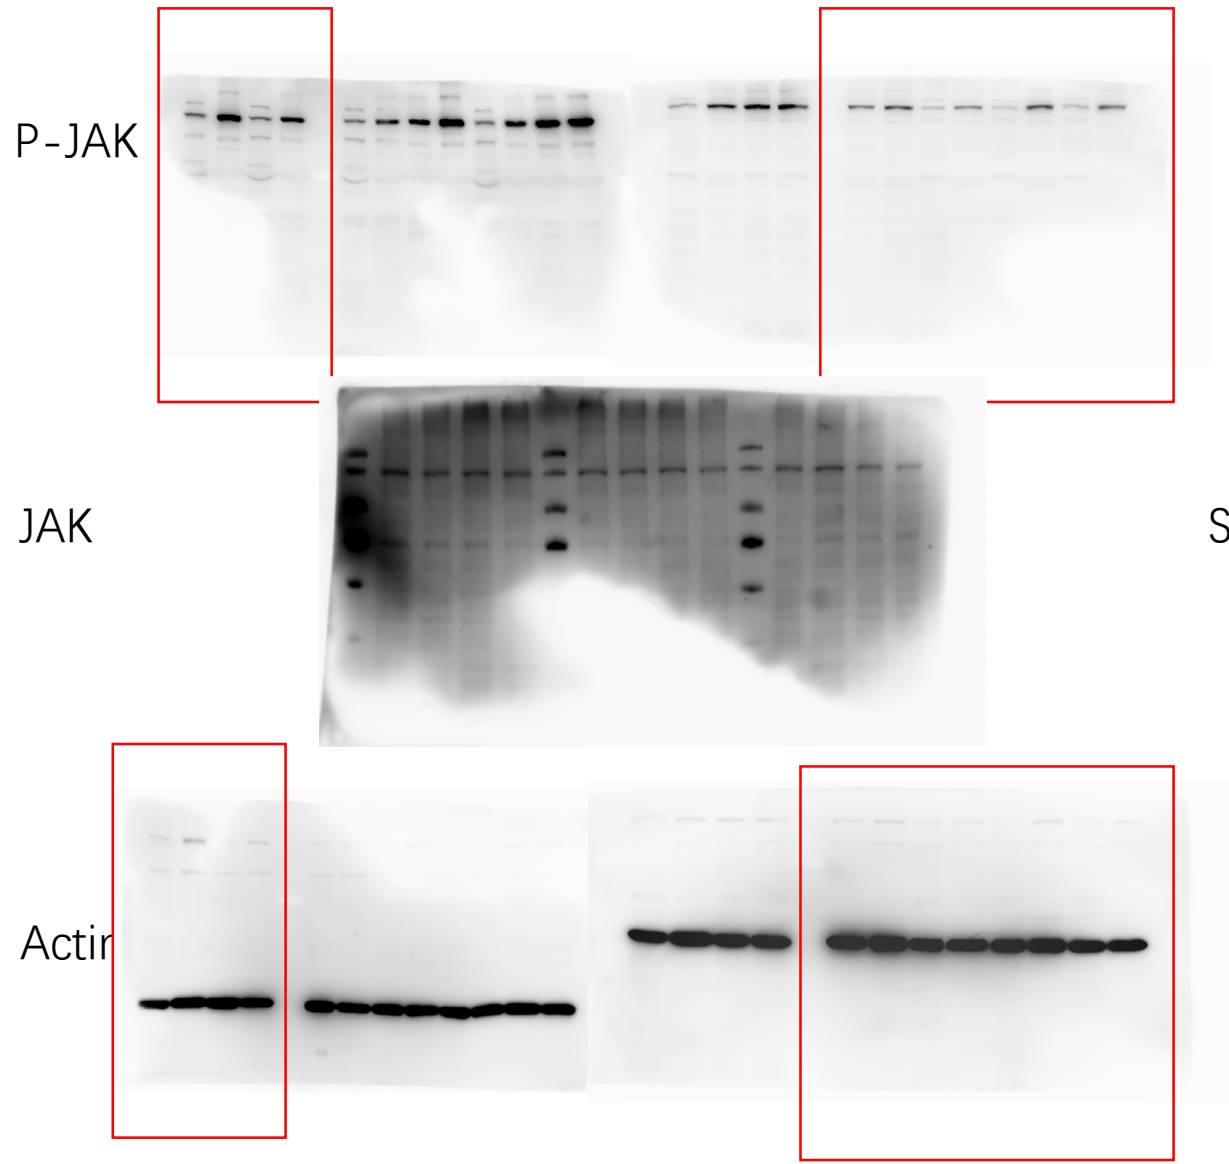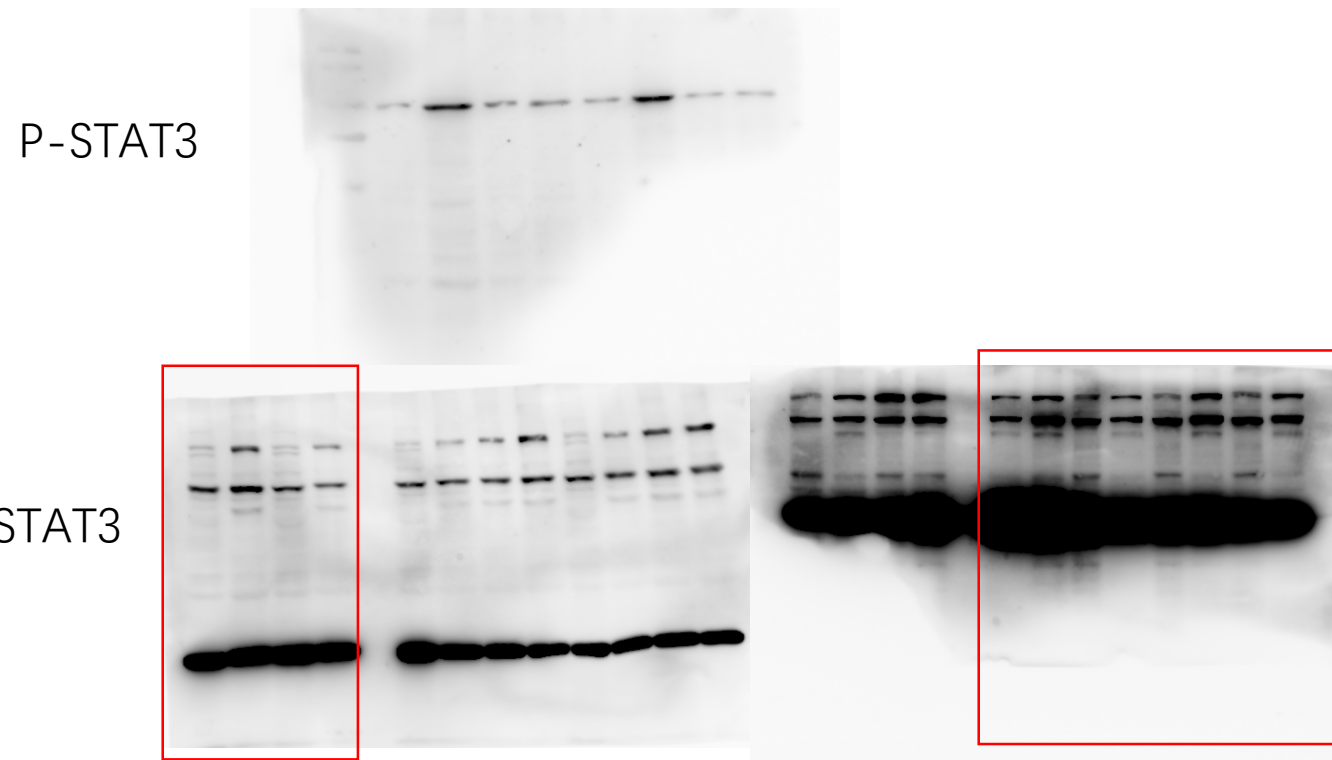

Fig.6E

TBK1

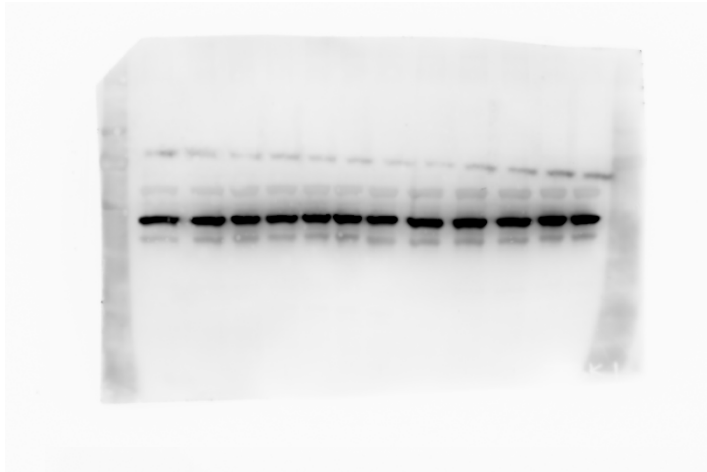

P-TBK1

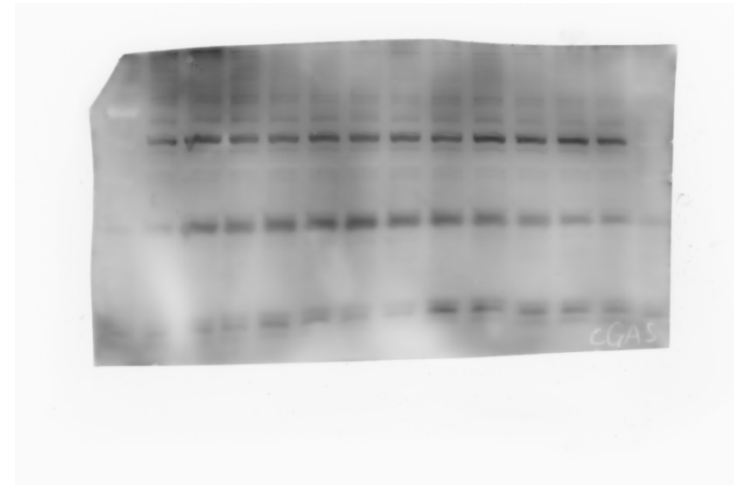

P-sting

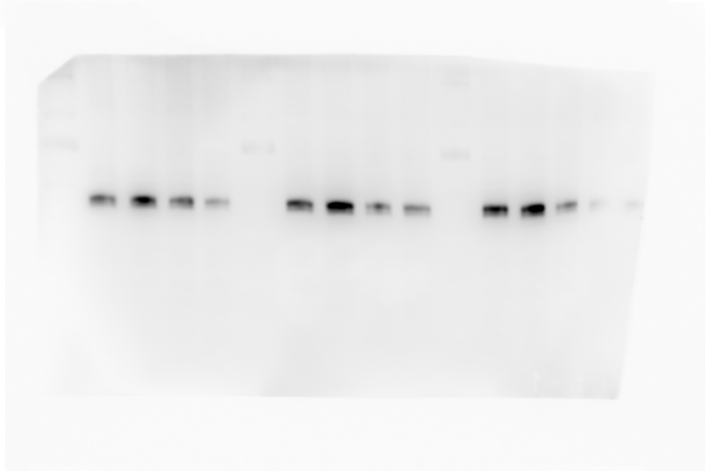

sting

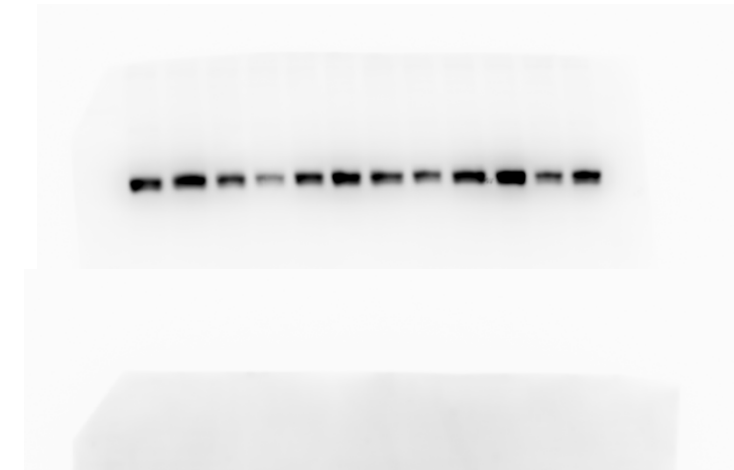

actin

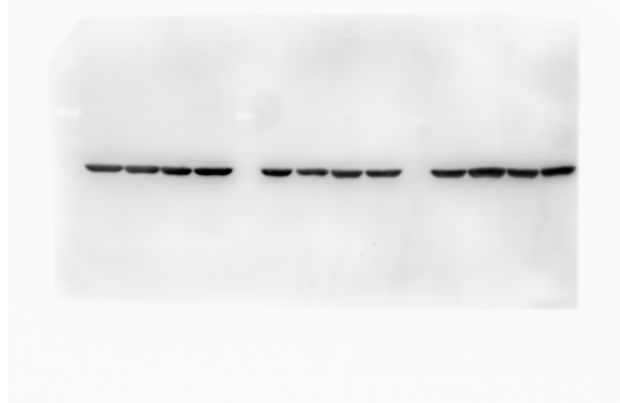

actin

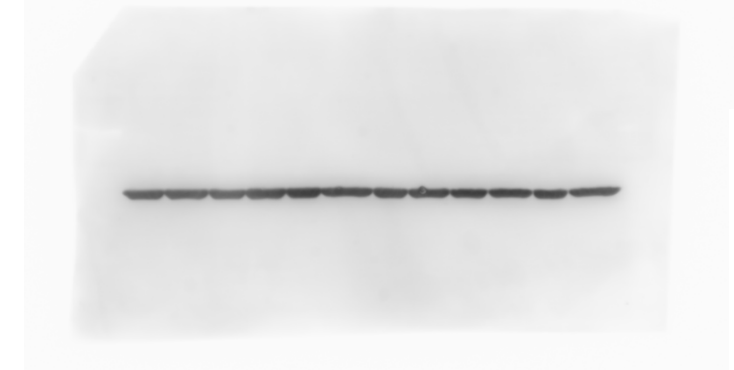

Fig.6F

WT-As unc9995  
IL-6 stimulation

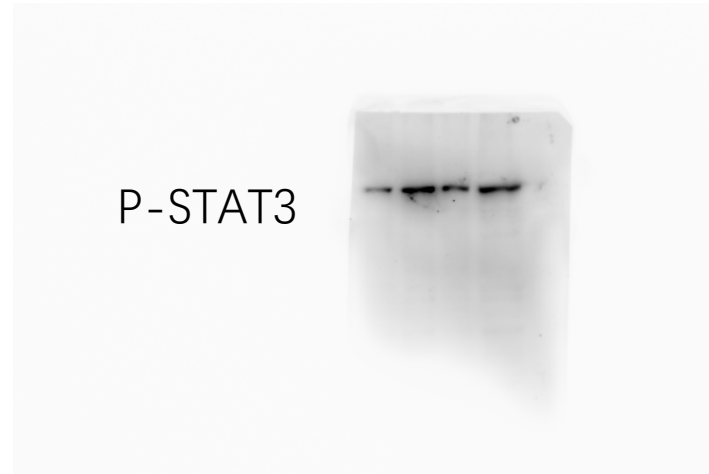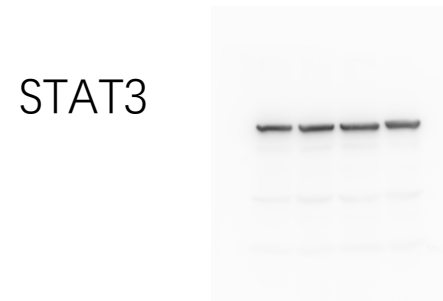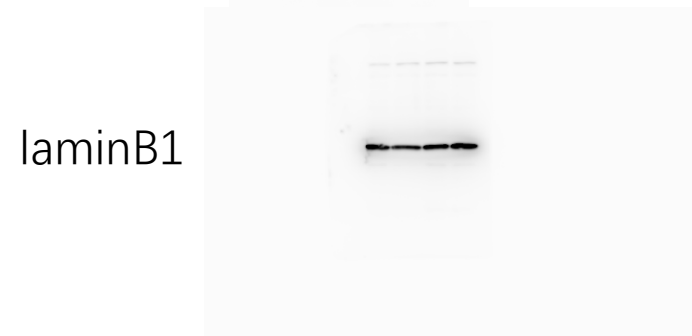

Fig.7G

Unc治疗-gfap

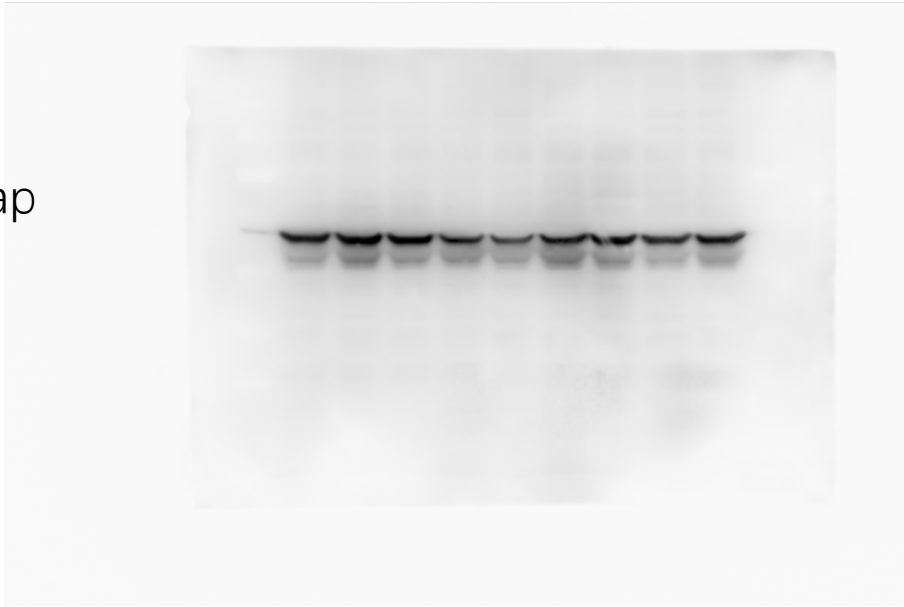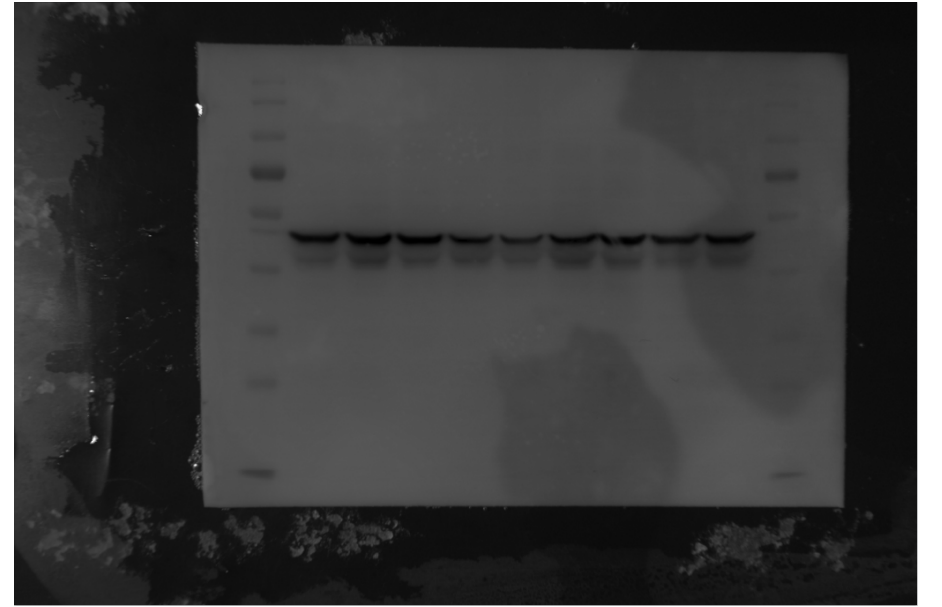

Actin (下面一条)

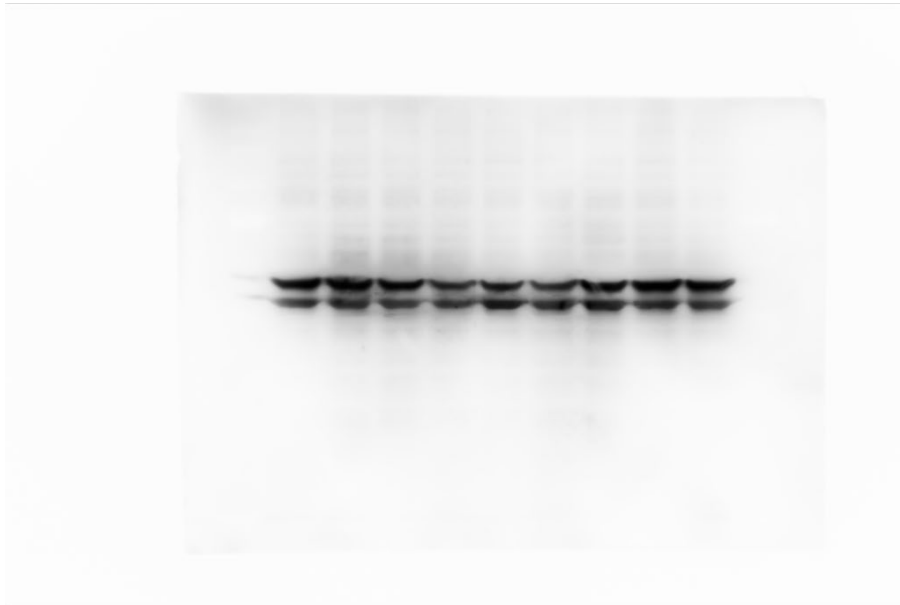

Fig.7G

Unc治疗-pstat3

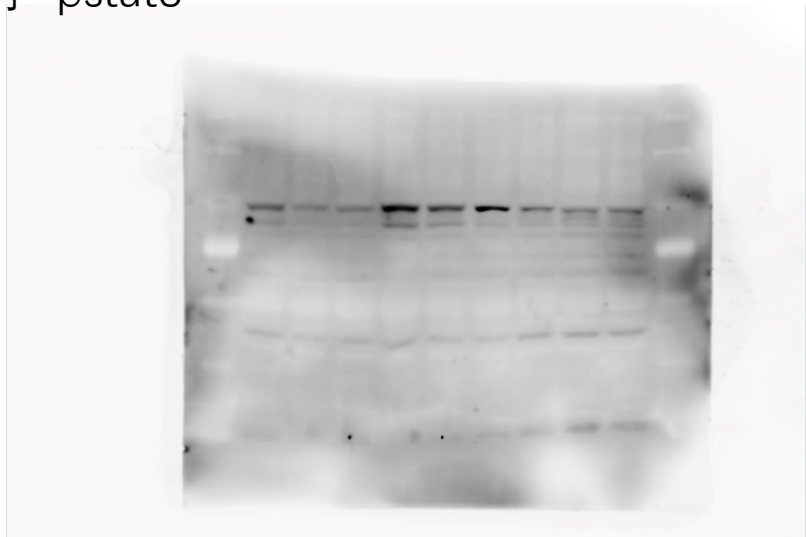

Unc治疗-stat3

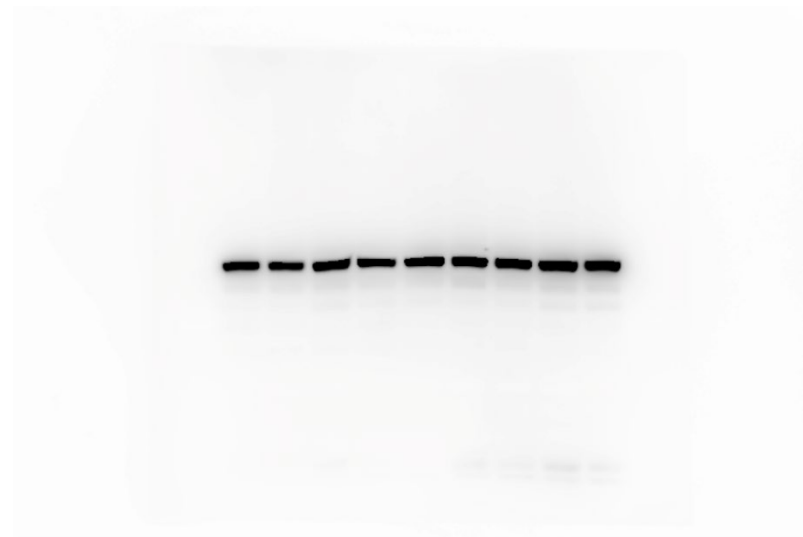

stat3-actin

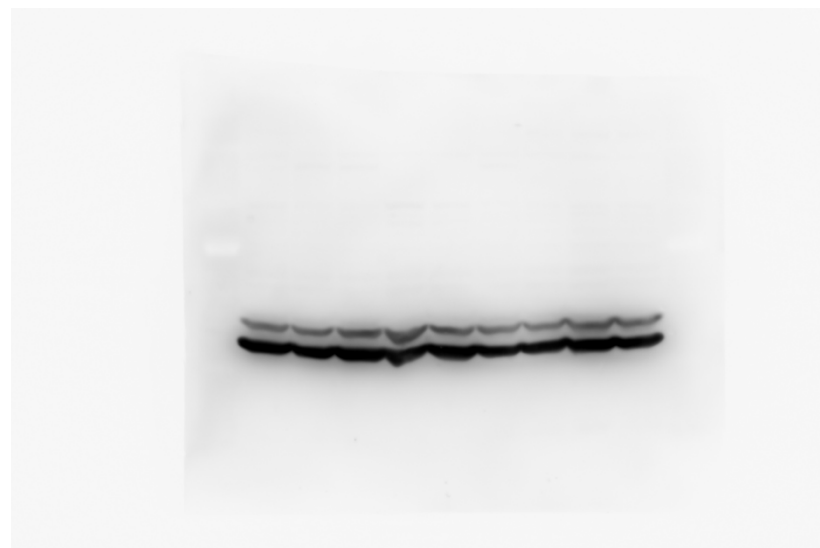

Fig.7G

Unc治疗-p-TBK1

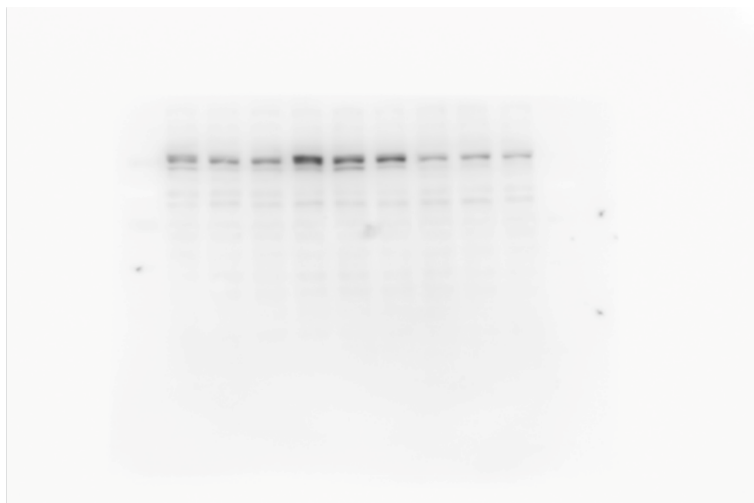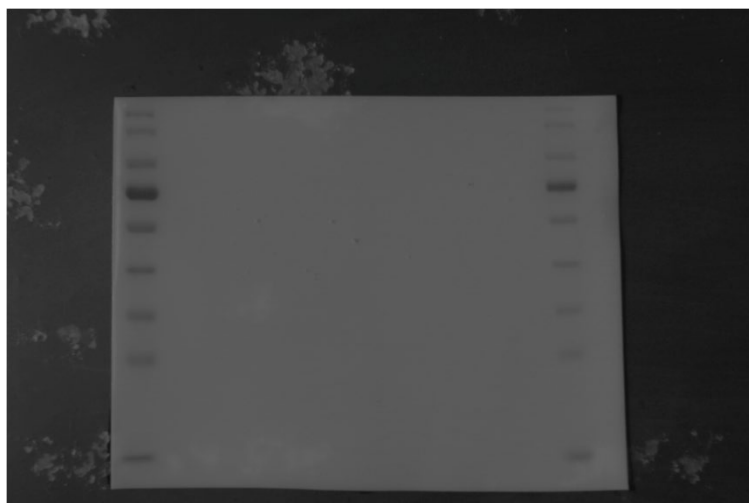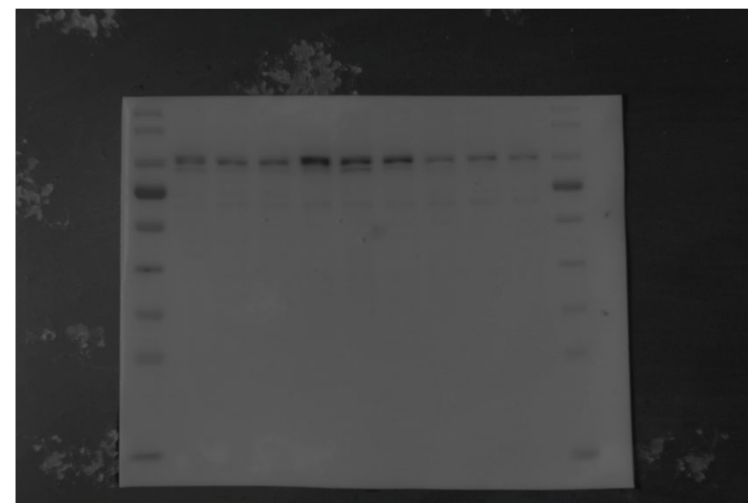

Fig.7G

Unc-cGAS

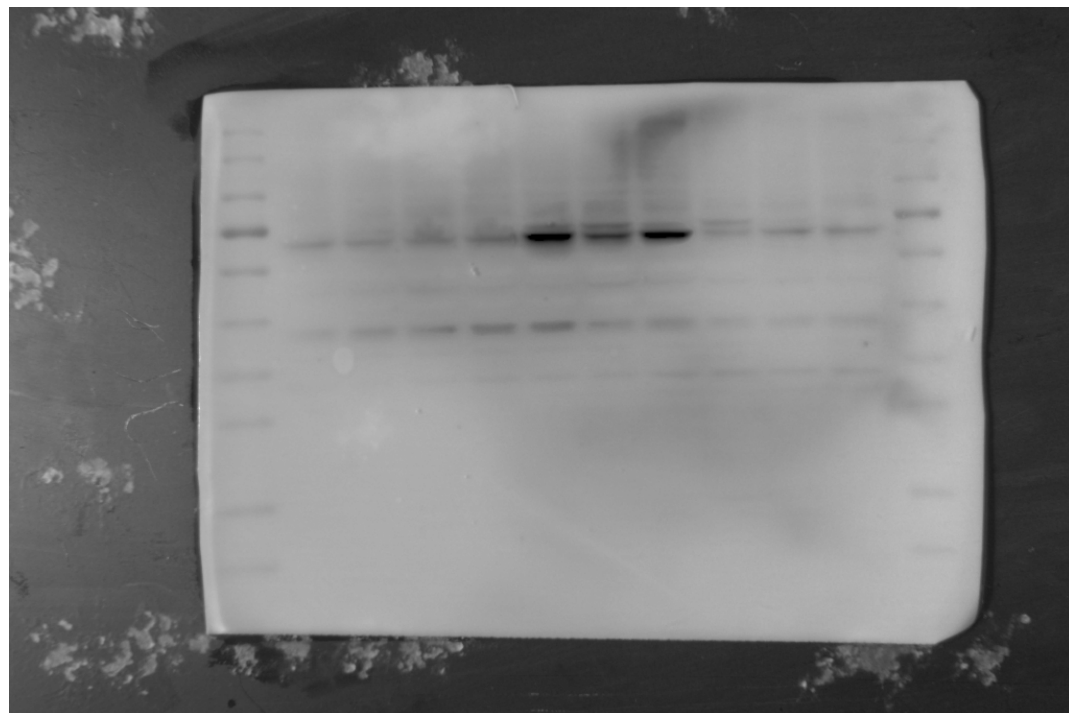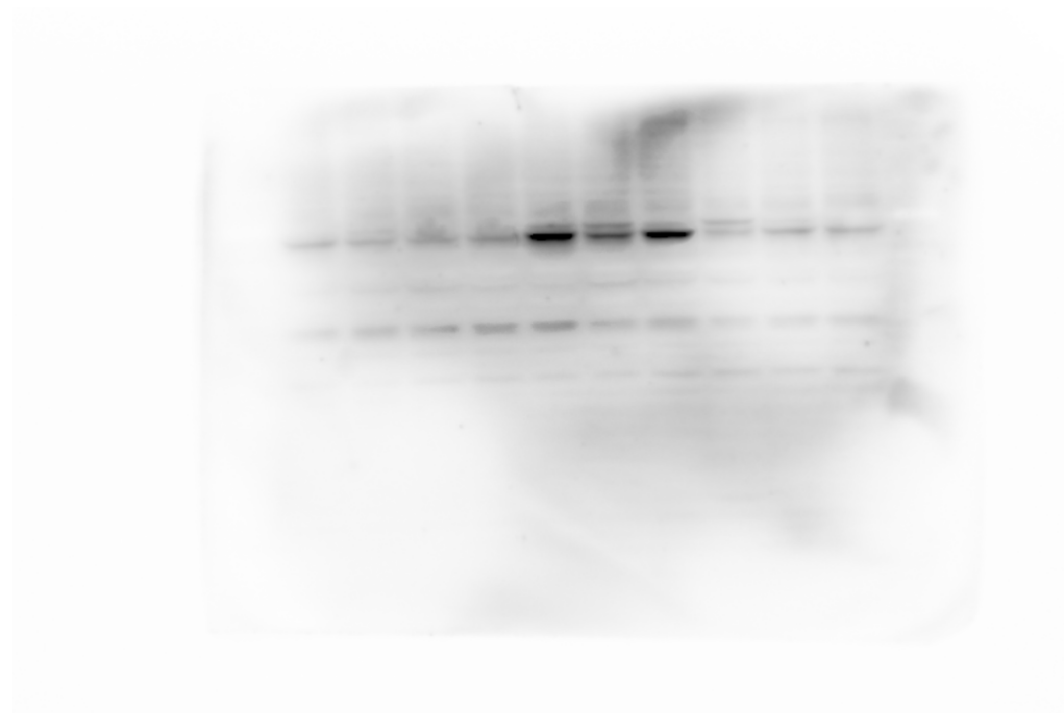

Fig.7G

Unc-STING/actin

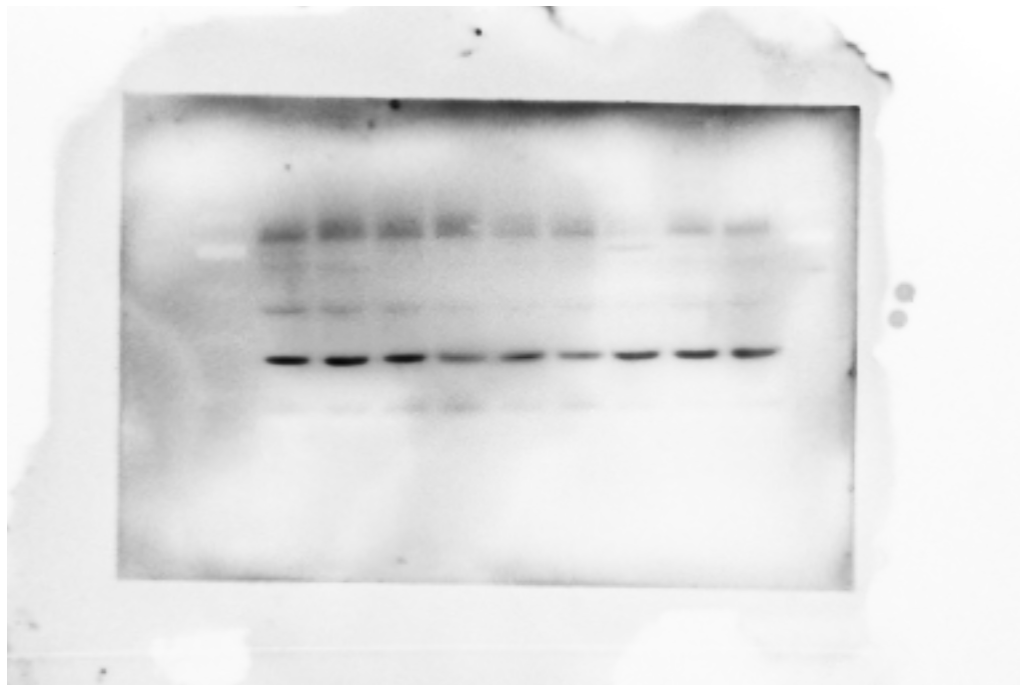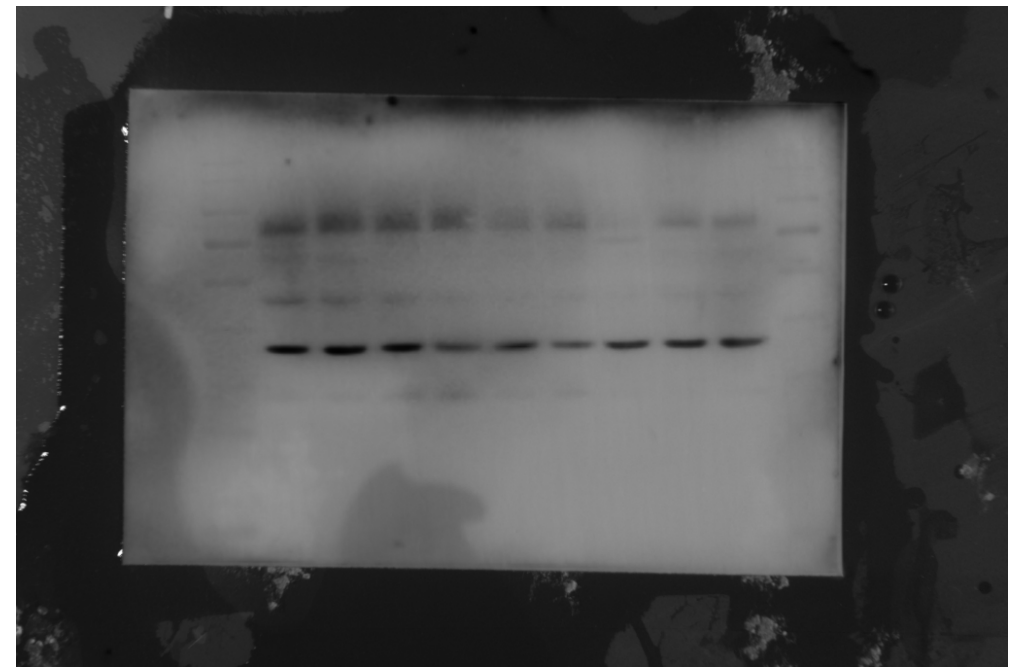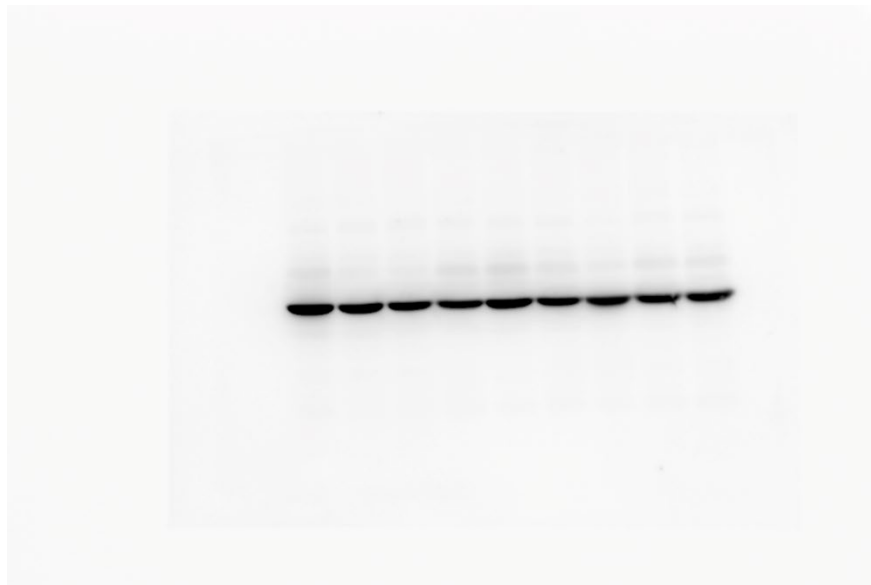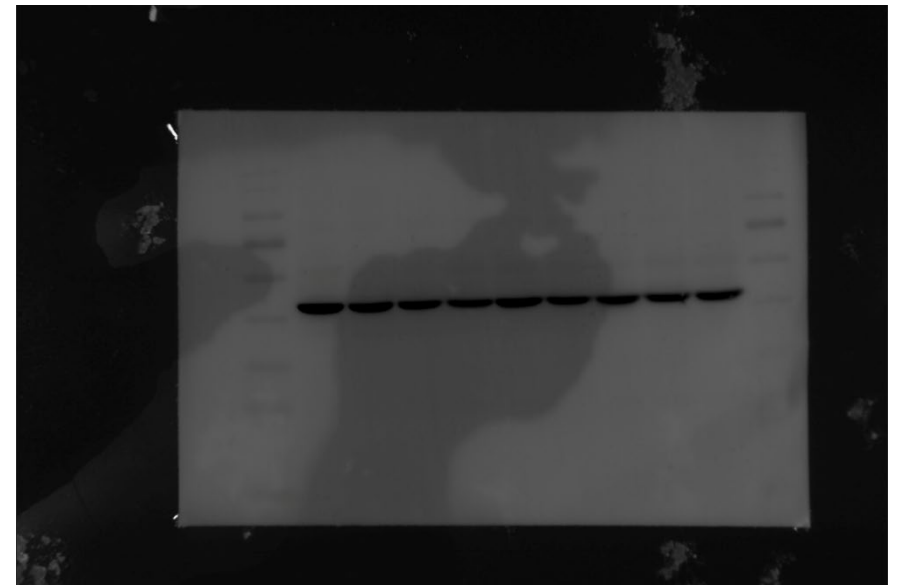



Fig.7G

Unc-TBK1

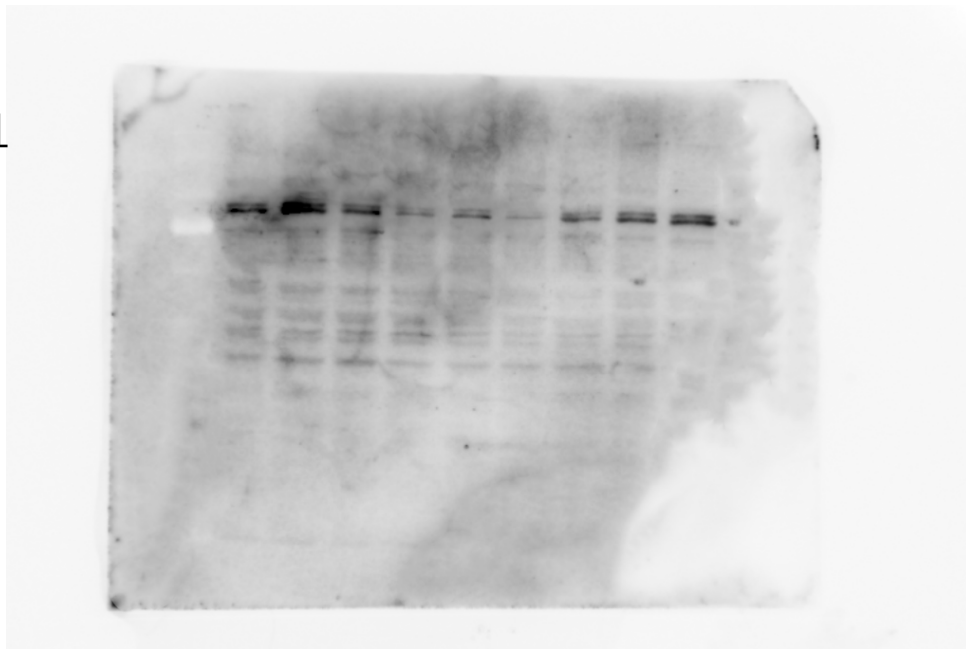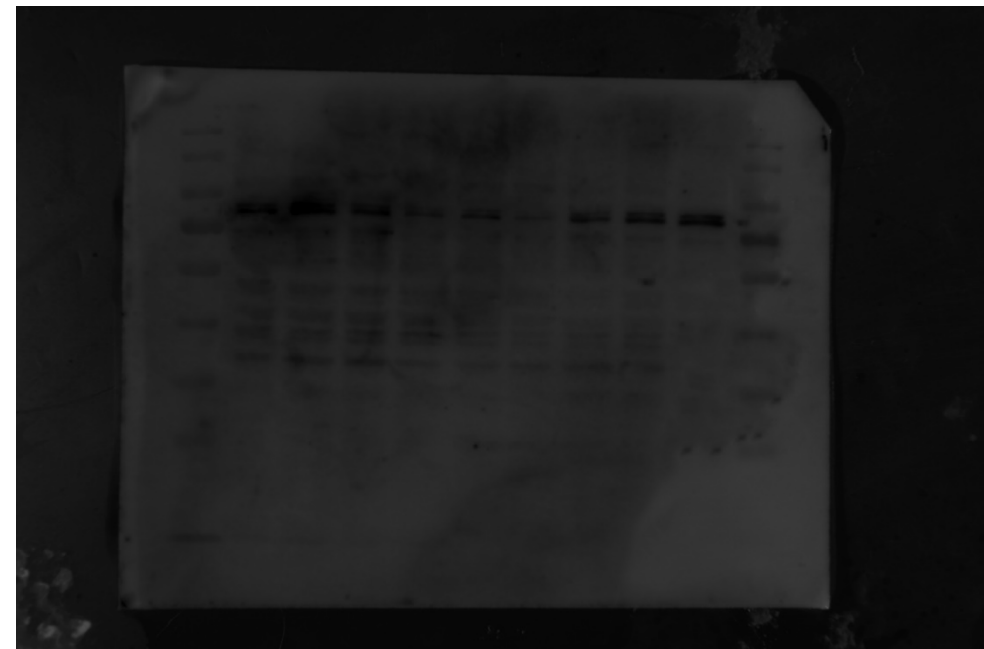

Unc-P-STING

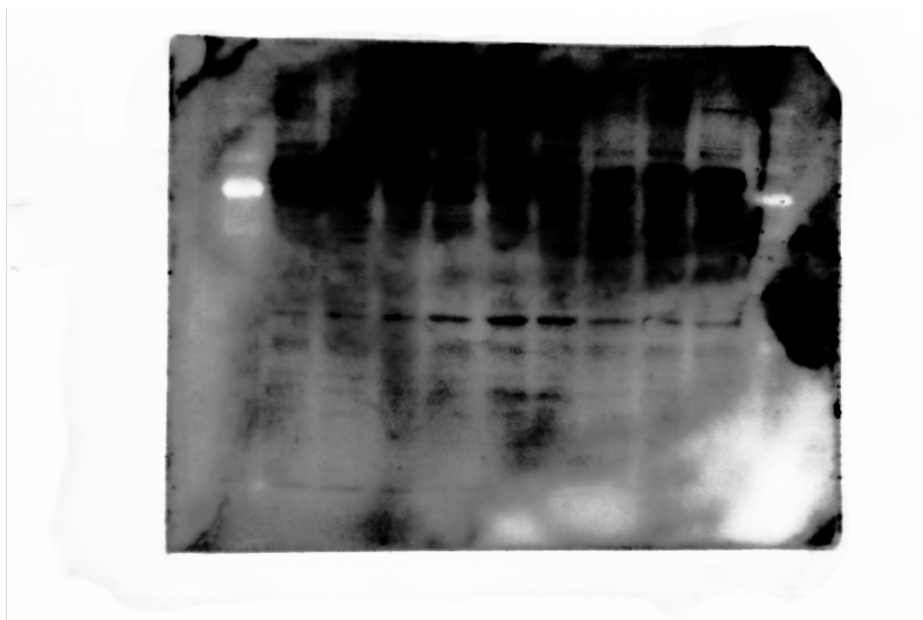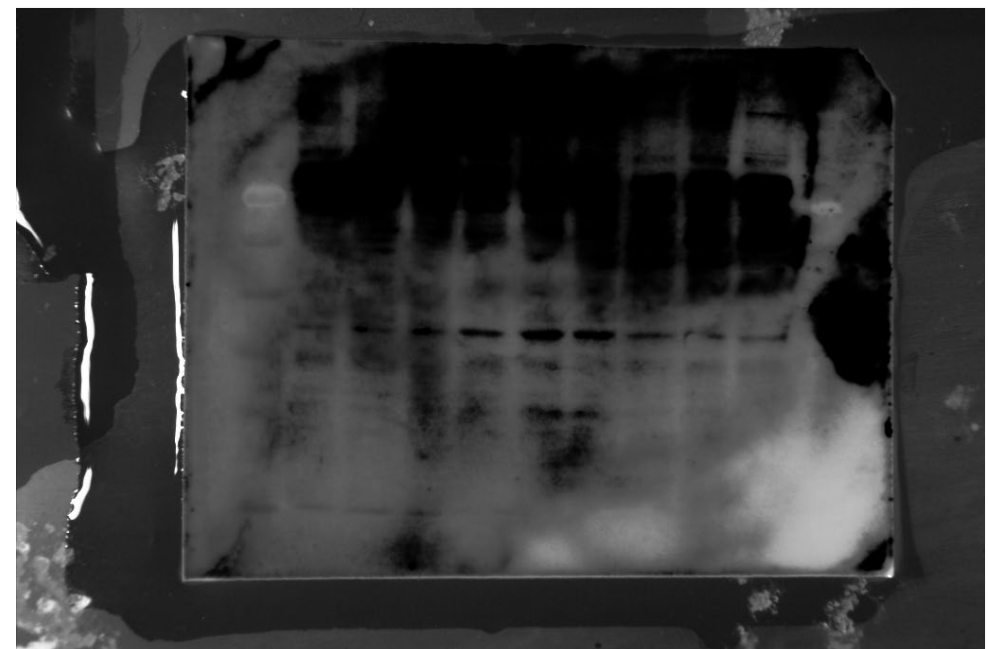

Fig.7G  
Unc-ACTIN

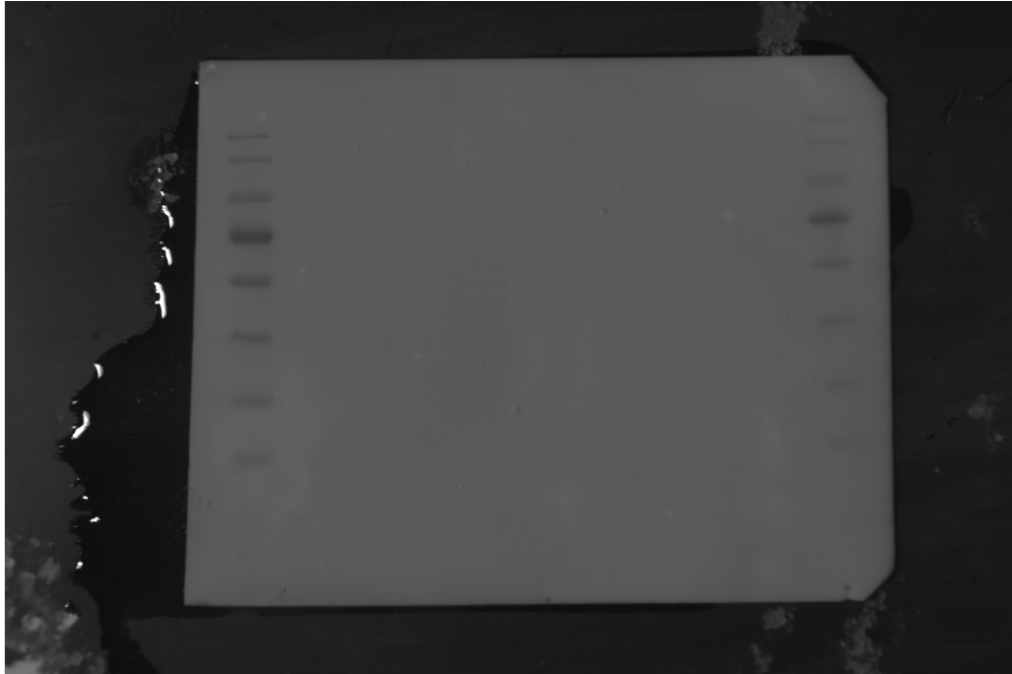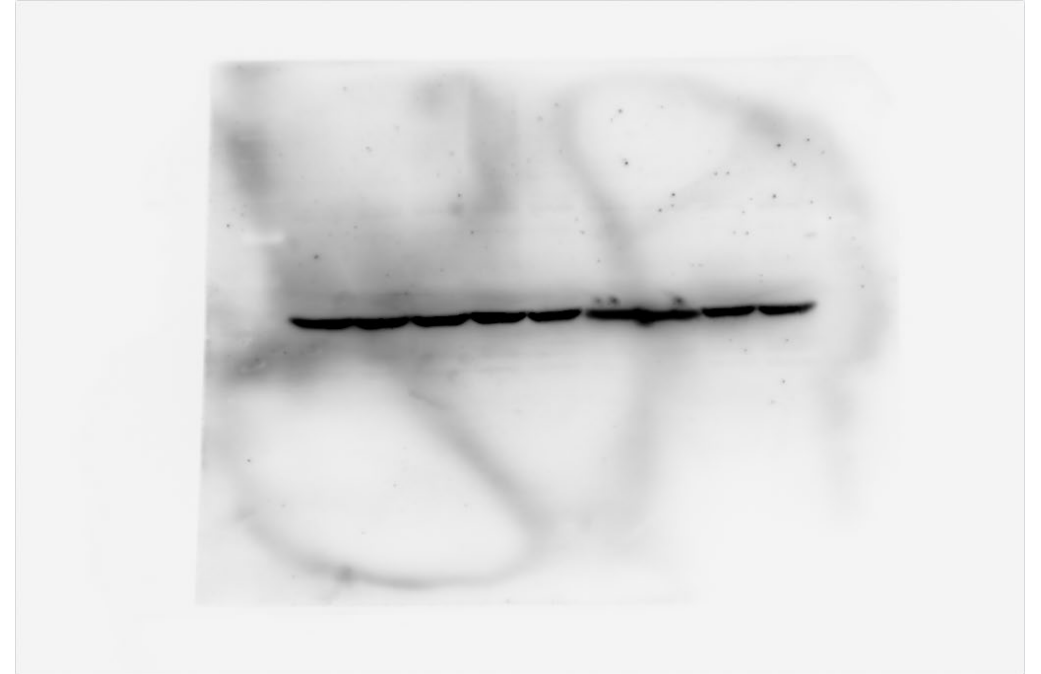

Fig.7G

Unc-irf3/actin

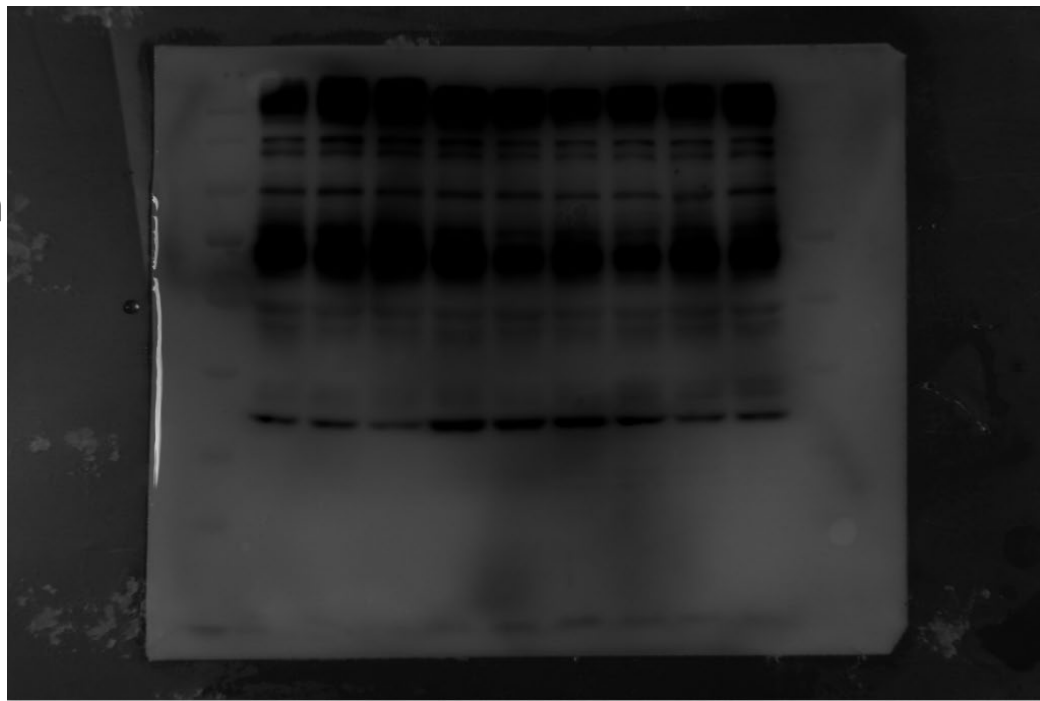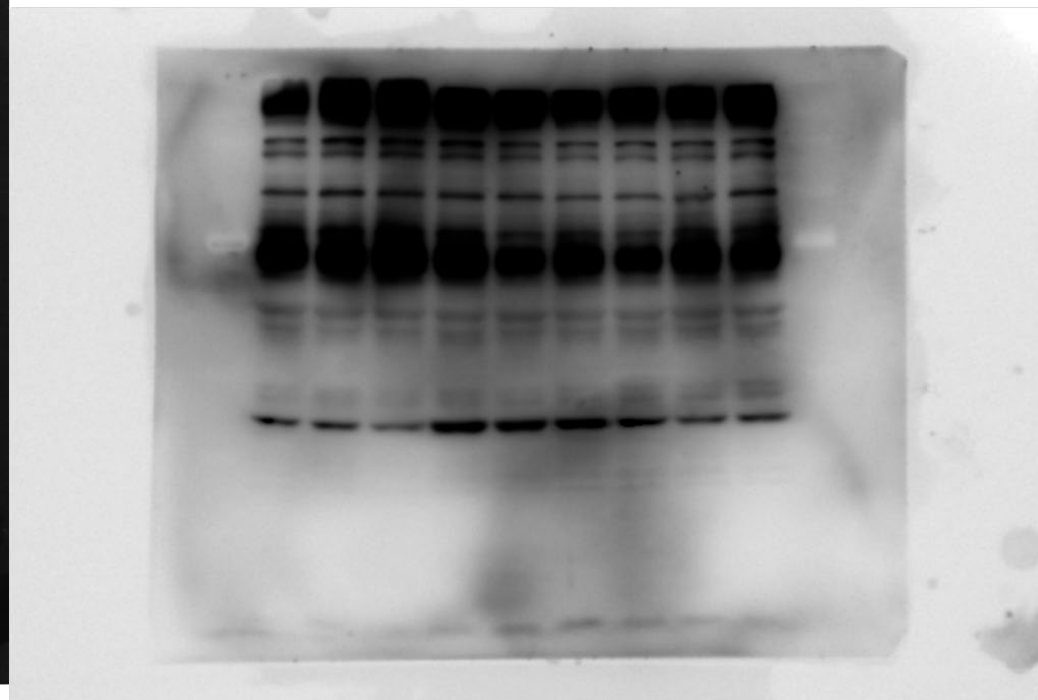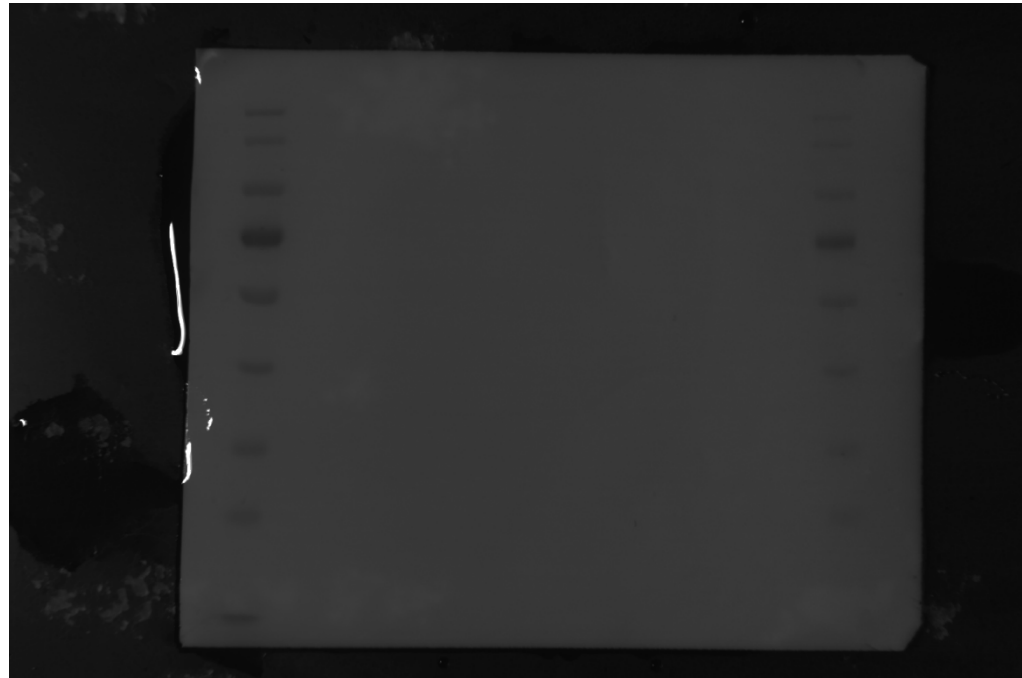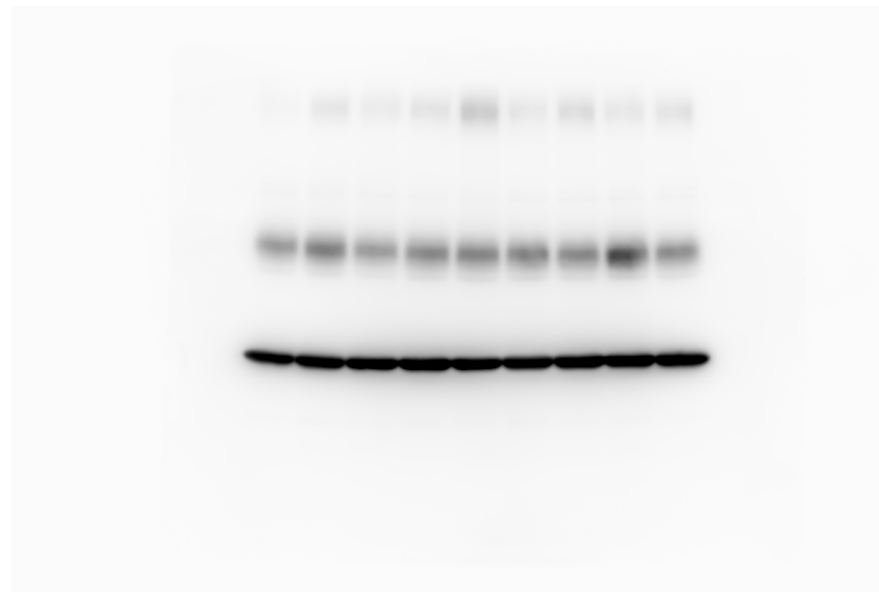

Supplement: 12974_2022_2597_MOESM2_ESM.pdf [file 12974_2022_2597_MOESM2_ESM.pdf]
